# Supplementary material for: Basement membranes are crucial for proper olfactory placode shape, position and boundary with the brain, and for olfactory axon development
Source: eLife. 2024 Dec 23;12:RP92004. doi: 10.7554/eLife.92004 (PMC11666240; doi:10.7554/eLife.92004)
Supplement: Figure 2—figure supplement 1—source data 1. [file elife-92004-fig2-figsupp1-data1.xlsx]

## Sheet: Feuil1
Figure 2-figure supplement 1B	Thickness of the intercellular space in the OP (nm) at 24 hpf
	controls	mutants
	30.3859	27.4596
	30.9606	26.4077
		31.9936
Figure 2-figure supplement 1D	Thickness of the intercellular space in the OP (nm) at 32 hpf
	controls	mutants
	23.5998	28.9898
	23.6696	34.27
Figure 2-figure supplement 1F	Thickness of the intercellular space in the brain (nm) at 24 hpf
	controls	mutants
	37.3543	27.1709
	27.3843	27.0744
	29.081	25.1728
Figure 2-figure supplement 1H	Thickness of the intercellular space in the brain (nm) at 32 hpf
	controls	mutants
	22.2773	30.9387
	34.921	28.0372
		39.8913
