# Supplementary material for: Basement membranes are crucial for proper olfactory placode shape, position and boundary with the brain, and for olfactory axon development
Source: eLife. 2024 Dec 23;12:RP92004. doi: 10.7554/eLife.92004 (PMC11666240; doi:10.7554/eLife.92004)
Supplement: Figure 2—source data 1. [file elife-92004-fig2-data1.xlsx]

## Sheet: Feuil1
Figure 2M	Thickness of the intercellular space (nm) at 24 hpf
	controls	mutants
	136.268	46.3667
	146.854	34.2943
	97.2614	38.5522
Figure 2N	Thickness of the intercellular space (nm) at 32 hpf
	controls	mutants
	137.303	29.3101
	246.641	52.6592
		107.69
