# Supplementary material for: Basement membranes are crucial for proper olfactory placode shape, position and boundary with the brain, and for olfactory axon development
Source: eLife. 2024 Dec 23;12:RP92004. doi: 10.7554/eLife.92004 (PMC11666240; doi:10.7554/eLife.92004)
Supplement: Figure 3—figure supplement 1—source data 1. [file elife-92004-fig3-figsupp1-data1.xlsx]

## Sheet: proliferation
Figure 3-figure supplement 1E	Number of PH3-positive cells in the left OP at 16 hpf
	controls	mutants
	1	0
	4	1
	1	3
	1	4
	2	4
	3	4
	3	7
	2	0
	2
	2
	7
	2
	5
	3
	6
	4
	2
	8
	4
Figure 3-figure supplement 1F	Number of PH3-positive cells in the left OP at 21 hpf
	controls	mutants
	2	4
	6	5
	10	4
	2	5
	3	2
	5	8
	5
	6
	5
	3
	3
	2
	7
	6
	6
	7
	5
	7
	4
	6
	5
Figure 3-figure supplement 1G	Number of PH3-positive cells in the left OP at 28 hpf
	controls	mutants
	1	1
	2	4
	4	2
	1	1
	4	0
	2	2
	3	2
	6
Figure 3-figure supplement 1H	Number of PH3-positive cells in the left OP at 36 hpf
	controls	mutants
	0	1
	1	2
	0	3
	2	2
	2	1
	2	4
	2	2
	3	1
	0	0

## Sheet: apoptosis
Figure 3-figure supplement 1M
16 hpf
categories	0 casp3*-positive cell	1 or 2 casp3*-positive cell(s)	> 2 casp3*-positive cells
number of control embryos	20	4	1
number of mutant embryos	5	3	1
Figure 3-figure supplement 1N
21 hpf
categories	0 casp3*-positive cell	1 or 2 casp3*-positive cell(s)	> 2 casp3*-positive cells
number of control embryos	20	4	1
number of mutant embryos	5	4	0
Figure 3-figure supplement 1O
28 hpf
categories	0 casp3*-positive cell	1 or 2 casp3*-positive cell(s)	> 2 casp3*-positive cells
number of control embryos	6	2	0
number of mutant embryos	3	5	2
Figure 3-figure supplement 1P
36 hpf
categories	0 casp3*-positive cell	1 or 2 casp3*-positive cell(s)	> 2 casp3*-positive cells
number of control embryos	9	1	0
number of mutant embryos	2	3	5

## Sheet: total number of cells
Figure 3-figure supplement 1Q	Total number of YFP-positive cells in the left OP at 28 hpf
	controls	mutants
	241	287
	303	298
	301	279
Figure 3-figure supplement 1R	Total number of YFP-positive cells in the left OP at 36 hpf
	controls	mutants
	276	315
	255	271
	231	233
