# Supplementary material for: Basement membranes are crucial for proper olfactory placode shape, position and boundary with the brain, and for olfactory axon development
Source: eLife. 2024 Dec 23;12:RP92004. doi: 10.7554/eLife.92004 (PMC11666240; doi:10.7554/eLife.92004)
Supplement: Figure 3—source data 1. [file elife-92004-fig3-data1.xlsx]

## Sheet: OP dimensions
Figure 3C	AP dimension of the left OP (µm)				Figure 3D	ML dimension of the left OP (µm)				Figure 3E	DV dimension of the left OP (µm)
	controls	mutants				controls	mutants				controls	mutants
	63.5542	80.4057				36.5918	58.7395				65.4603	65.4603
	78.9613	73.6651				43.8139	44.2953				65.4603	65.4603
	65.9615	71.7392				45.7398	49.5915				72.5098	61.4319
	63.0727	69.3318				52.9618	52.4803				72.5098	72.5098
	76.5539	55.3692				40.925	39.9621				68.4815	73.5169
	75.591	68.3689				52.9618	56.8136				59.4178	68.4815
	58.7395	63.0727				30.3327	63.5542				62.439	74.524
	74.1465	86.6648				39.4806	40.4436				58.4107	66.4673
	65.4801	70.7763				32.2586	44.7768				68.4815	72.5098
	74.1465	77.9983				53.9248	62.1098				52.3682	62.439
	63.5542	78.4798				42.8509	46.2212				69.4886	67.4744
	49.5915	69.8133				42.8509	44.7768				70.4957	40.2832
	62.5912	70.2948				38.0362	53.4433				84.5948	53.3753
	73.6651	96.7757				46.2212	57.2951				65.4603	56.3965
	61.6283	74.1465				37.0733	53.4433				60.4249	61.4319
	51.0359	85.7019				45.7398	51.9989				63.4461	52.3682
	77.0354	77.9983				36.5918	47.6656				61.4319	63.4461
	57.7765	52.4803				33.703	39.9621				67.4744	59.4178
	63.0727	76.0724				44.2953	39.4806				54.3824	59.4178
	57.7765	63.0727				45.2583	41.4065				62.439	69.4886
	56.3321	88.1092				54.8877	48.1471				69.4886	58.4107
	68.8504	71.2577				46.2212	33.2215				62.439	54.3824
	58.258	63.5542				48.6286	47.1842				72.5098	51.3611
	83.776	74.1465				40.925	39.4806				64.4532	54.3824
	75.1095	65.4801				45.7398	46.7027				65.4603	72.5098
	68.8504	60.1839				41.4065	49.1101				66.4673	57.4036
	76.0724	56.8136				38.9992	60.1839				70.4957	76.5382
	72.7021	74.1465				44.7768	55.3692				65.4603	67.4744
	78.4798	60.1839				45.2583	45.2583				64.4532	59.4178
	72.7021	76.5539				37.5547	52.4803				62.439	61.4319
	66.9245	60.1839				40.925	48.1471				49.347	58.4107
	97.7386	81.3686				46.7027	27.4439				46.3257	60.4249
	78.9613					47.1842					52.3682
	77.9983					41.888					54.3824
	74.1465					38.9992					55.3895
	77.0354					36.5918					42.2974
	73.1836					28.8883					37.262
	78.9613					41.4065					43.3045
	73.6651					48.6286					58.4107
	76.5539					45.2583					48.3399
	82.813					39.4806					60.4249
	61.6283					47.1842					63.4461
	70.2948					42.8509					66.4673
	65.4801					44.2953					66.4673
	71.7392					35.6289					62.439
	75.591					44.7768					63.4461
	61.1468					35.1474					56.3965
	74.628					43.3324					57.4036
	67.8874					44.2953					62.439
	60.1839					46.7027					47.3328
	69.3318					42.8509					56.3965
	50.5545					27.9253					51.3611
	52.9618					40.925					55.3895
	56.8136					57.7765					60.4249
	64.9986					36.5918					50.3541
	67.406					46.2212					62.439
	70.2948					38.9992					55.3895
	68.8504					51.0359					52.3682
	53.9248					38.9992					64.4532
	67.8874					34.6659					61.4319
	58.258					39.4806					50.3541
	69.8133					50.073					57.4036

## Sheet: mean MSD
Figure 3J
controls	MSD of placode cells (µm2)	Delta t (s)		mutants	MSD of placode cells (µm2)	Delta t (s)
	0	0			0	0
	8.1989	600			12.0424	600
	15.5394	1200			24.1512	1200
	23.4906	1800			38.4054	1800
	32.0493	2400			53.8597	2400
	41.2613	3000			70.8949	3000
	51.3041	3600			89.2935	3600
	61.7926	4200			108.793	4200
	72.5902	4800			128.353	4800
	84.3383	5400			148.722	5400
	96.5973	6000			169.965	6000
	109.442	6600			191.902	6600
	123.381	7200			214.979	7200
	138.332	7800			238.017	7800
	153.155	8400			260.928	8400
	168.957	9000			283.72	9000
	184.997	9600			306.52	9600
	201.472	10200			328.73	10200
	218.18	10800			350.635	10800
	235.213	11400			371.852	11400
	252.678	12000			392.764	12000
	270.704	12600			414.117	12600
	289.257	13200			435.807	13200
	307.413	13800			455.986	13800
	325.708	14400			476.25	14400
	344.404	15000			496.803	15000
	363.162	15600			516.176	15600
	382.461	16200			535.089	16200
	401.624	16800			554.088	16800
	420.823	17400			572.114	17400
	440.192	18000			589.826	18000
	459.328	18600			606.636	18600
	478.555	19200			623.096	19200
	497.037	19800			637.414	19800
	514.636	20400			651.993	20400
	531.472	21000			667.293	21000
	547.894	21600			683.447	21600
	564.761	22200			699.735	22200
	581.566	22800			717.586	22800
	596.99	23400			735.341	23400
	610.79	24000			753.721	24000
	624.789	24600			771.365	24600
	639.216	25200			792.101	25200
	654.047	25800			814.204	25800
	669.604	26400			838.173	26400
	686.048	27000			864.709	27000
	703.516	27600			891.912	27600
	719.759	28200			918.631	28200
	735.229	28800			946.228	28800
	756.1	29400			974.273	29400
	778.105	30000			1003.83	30000
	802.613	30600			1038.41	30600
	830.356	31200			1073.11	31200
	860.8	31800			1108.59	31800
	892.04	32400			1146.37	32400
	921.29	33000			1197.1	33000
	951.937	33600			1248.66	33600
	983.221	34200			1311.81	34200
	1005.96	34800			1368.54	34800
Figure 3K
controls	MSD of brain cells (µm2)	Delta t (s)		mutants	MSD of brain cells (µm2)	Delta t (s)
	0	0			0	0
	11.6297	600			14.9297	600
	22.5955	1200			30.8214	1200
	35.2132	1800			48.9225	1800
	48.2189	2400			68.6112	2400
	61.3626	3000			90.016	3000
	75.2573	3600			112.969	3600
	89.9613	4200			137.124	4200
	105.39	4800			162.938	4800
	120.852	5400			190.286	5400
	137.116	6000			219.13	6000
	153.945	6600			249.016	6600
	170.427	7200			279.043	7200
	186.425	7800			308.226	7800
	202.377	8400			337.361	8400
	218.338	9000			367.014	9000
	233.515	9600			396.229	9600
	247.688	10200			424.247	10200
	260.462	10800			451.726	10800
	271.707	11400			477.824	11400
	282.566	12000			503.828	12000
	292.068	12600			526.774	12600
	300.804	13200			547.849	13200
	308.733	13800			566.444	13800
	314.688	14400			583.785	14400
	319.759	15000			599.978	15000
	324.698	15600			615.013	15600
	331.082	16200			629.158	16200
	335.206	16800			643.311	16800
	339.131	17400			657.469	17400
	342.665	18000			670.774	18000
	345.188	18600			682.392	18600
	347.728	19200			694.029	19200
	349.315	19800			703.148	19800
	351.479	20400			711.93	20400
	351.54	21000			719.971	21000
	353.102	21600			728.847	21600
	356.645	22200			739.224	22200
	359.397	22800			749.026	22800
	363.937	23400			760.071	23400
	367.587	24000			774.875	24000
	372.07	24600			791.912	24600
	375.194	25200			812.326	25200
	379.395	25800			838.069	25800
	384.848	26400			866.779	26400
	392.95	27000			898.346	27000
	402.543	27600			933.708	27600
	414.422	28200			973.411	28200
	428.778	28800			1013.3	28800
	446.05	29400			1061.05	29400
	463.206	30000			1110.99	30000
	483.62	30600			1171.81	30600
	505.091	31200			1234.27	31200
	528.951	31800			1294.5	31800
	554.466	32400			1353.35	32400
	590.327	33000			1426.6	33000
	629.85	33600			1503.47	33600
	677.999	34200			1589.26	34200
	738.546	34800			1664.88	34800

## Sheet: MSD placode individual embryos
Figure 3J
controls	MSD of placode cells (µm2)
	control 1 placode 1	control 1 placode 2	control 2 placode 1	control 2 placode 2	control 3 placode 1	control 3 placode 2	control 4 placode 1	control 4 placode 2	control 5 placode 1	control 5 placode 2	Delta t (s)										Delta t (s)
	0	0	0	0	0	0	0	0	0	0	0										0
	8.66777	6.99281	9.47252	6.25809	10.75	11.5299	5.98869	5.81258	7.77468	8.74193	600										600
	16.4989	14.0992	19.2732	11.9282	18.2856	20.2637	11.0746	11.0533	14.3963	18.5214	1200										1200
	25.2289	23.0744	30.2051	17.357	27.4898	29.0136	16.8704	16.299	21.1127	28.2557	1800										1800
	36.6857	33.5521	43.7357	22.0221	36.5519	38.4702	23.8065	21.4403	27.3371	36.8917	2400										2400
	49.6318	45.3793	58.6513	27.8797	44.4138	48.6517	31.8691	26.8094	33.2353	46.0917	3000										3000
	64.013	59.1918	73.8762	34.151	53.5811	59.5356	41.2968	33.6006	38.9418	54.853	3600										3600
	80.2573	74.4819	89.8086	40.6622	60.9399	72.9055	51.1377	39.4494	45.2917	62.9921	4200										4200
	98.08	90.5706	107.131	47.3009	66.7611	86.081	62.3363	45.0724	50.8368	71.7314	4800										4800
	117.578	107.704	125.059	54.6839	72.8272	101.847	74.6052	51.6289	57.2375	80.2126	5400										5400
	137.649	127.041	144.643	62.6126	78.3158	118.979	88.5103	58.2701	63.7188	86.2341	6000										6000
	159.193	146.81	164.756	71.5581	84.9589	137.691	103.28	65.2231	69.9124	91.0402	6600										6600
	182.499	167.252	185.125	80.9755	91.9549	157.24	119.838	72.1519	76.9676	99.8032	7200										7200
	206.158	189.173	205.89	91.2062	100.171	179.469	137.906	79.3353	85.5809	108.435	7800										7800
	230.081	211.193	226.535	102.11	106.473	200.592	156.85	86.5787	94.001	117.133	8400										8400
	255.55	235.502	247.761	113.783	115.034	221.973	177.11	94.2836	101.129	127.447	9000										9000
	279.989	260.305	268.811	126.33	122.197	243.367	198.742	102.907	109.001	138.32	9600										9600
	299.401	284.227	289.92	139.166	131.738	268.959	222.828	112.733	117.108	148.642	10200										10200
	320.215	308.435	311.532	152.591	139.786	294.604	248.204	122.435	125.435	158.559	10800										10800
	340.185	333.878	331.682	166.09	148.242	321.399	275.591	133.002	135.392	166.671	11400										11400
	360.2	358.593	351.842	179.475	156.649	349.908	304.716	144.827	144.898	175.675	12000										12000
	378.28	384.3	374.036	193.057	165.842	379.161	334.359	157.468	155.001	185.532	12600										12600
	396.068	409.374	400.033	207.017	175.321	408.62	365.439	169.753	164.916	196.033	13200										13200
	411.967	435.317	424.764	221.02	181.535	439.707	396.455	182.15	173.955	207.255	13800										13800
	427.03	461.856	450.071	235.594	188.851	468.83	430.251	193.565	181.835	219.2	14400										14400
	439.541	488.806	473.444	250.986	196.863	499.774	465.281	205.856	189.935	233.558	15000										15000
	451.882	515.163	499.048	267.747	203.194	528.63	501.063	218.1	197.197	249.593	15600										15600
	461.671	540.474	524.765	285.837	212.89	560.492	538.184	230.58	203.317	266.395	16200										16200
	470.973	565.165	548.761	303.365	219.979	593.148	576.798	243.207	212.096	282.744	16800										16800
	477.519	590.117	570.672	321.432	229.281	625.08	615.958	256.341	220.533	301.299	17400										17400
	484.535	614.684	594.586	340.172	236.777	659.529	654.525	269.187	229.31	318.615	18000										18000
	488.649	638.436	617.954	359.327	243.653	698.66	692.357	283.106	236.395	334.746	18600										18600
	494.675	663.356	641.504	378.806	251.154	735.604	728.519	295.315	242.84	353.772	19200										19200
	498.716	686.905	663.788	397.8	255.485	775.701	765.577	306.235	248.447	371.711	19800										19800
	503.489	708.481	686.044	417.82	258.517	812.769	801.71	317.071	253.347	387.107	20400										20400
	507.56	728.302	707.443	435.357	263.625	851.435	837.046	326.473	257.008	400.467	21000										21000
	509.673	744.846	728.009	453.463	267.62	887.623	875.058	333.847	259.275	419.526	21600										21600
	509.204	759.927	749.185	473.583	273.676	928.746	911.946	341.736	260.881	438.728	22200										22200
	512.332	769.876	770.158	494.054	280.212	971.806	946.955	350.194	263.812	456.261	22800										22800
	509.664	775.252	787.135	513.807	289.582	1012.91	982.852	358.716	267.385	472.595	23400										23400
	508.8	772.365	804.007	533.448	301.669	1045.75	1012.84	366.149	270.964	491.908	24000										24000
	508.384	766.735	819.569	553.888	317.259	1081.61	1041.8	371.288	273.714	513.654	24600										24600
	506.628	762.446	837.064	575.869	328.511	1119.02	1072.72	378.493	275.016	536.398	25200										25200
	504.823	758.249	857.033	597.246	343.188	1155.95	1100.85	385.512	281.295	556.321	25800										25800
	511.455	761.291	877.158	616.295	353.233	1188.49	1130.85	394.628	285.35	577.295	26400										26400
	515.127	768.436	905.678	635.966	365.055	1215.24	1161.57	402.651	288.778	601.978	27000										27000
	517.051	778.908	932.009	655.021	373.751	1248.52	1189.17	412.84	294.176	633.719	27600										27600
	512.955	791.996	964.14	666.767	386.552	1275.68	1208.85	425.153	299.193	666.309	28200										28200
	505.119	812.14	992.853	671.772	393.397	1296.26	1229.47	441.858	310.755	698.669	28800										28800
	503.321	834.876	1032.45	680.012	400.552	1327.44	1249.99	460.083	321.053	751.23	29400										29400
	505.101	857.882	1078.27	698.346	398.632	1365.77	1282.34	477.092	324.105	793.51	30000										30000
	515.232	877.304	1122.63	713.286	404.674	1410.4	1312.71	497.061	327.967	844.866	30600										30600
	527.976	906.733	1165.48	728.424	413.276	1459.11	1341.52	518.91	326.265	915.866	31200										31200
	539.811	932.926	1210.06	746.772	415.883	1502.06	1368.48	547.233	332.986	1011.79	31800										31800
	550.581	964.789	1243.99	756.619	416.758	1586.07	1396.83	566.577	348.193	1089.99	32400										32400
	566.767	981.758	1273.38	749.957	431.45	1652.04	1424.56	577.865	371.757	1183.36	33000										33000
	589.503	995.285	1296.38	724.553	440.312	1737.49	1457.92	597.466	396.393	1284.07	33600										33600
	622.289	1018.2	1285.89	682.8	452.393	1790.81	1507.21	606.993	428.032	1437.59	34200										34200
	644.053	1026.46	1194.93	676.042	487.719	1761.61	1609.62	619.809	466.237	1573.12	34800										34800
mutants	MSD of placode cells (µm2)
	mutant 1 placode 1	mutant 1 placode 2	mutant 2 placode 1	mutant 2 placode 2	mutant 3 placode 1	mutant 3 placode 2	mutant 4 placode 1	mutant 4 placode 2	mutant 5 placode 1	mutant 5 placode 2	Delta t (s)
	0	0	0	0	0	0	0	0	0	0	0
	11.9155	15.5831	10.3354	9.32554	12.237	10.8929	10.0159	9.61181	13.8964	16.6107	600
	23.3205	34.0912	19.5302	17.7263	23.524	20.8672	19.9583	18.4945	27.8105	36.1892	1200
	37.756	57.9174	28.0098	27.0654	35.8928	32.0956	30.2635	29.2311	45.3246	60.4977	1800
	54.8638	85.0347	35.8545	36.425	49.1908	43.1439	39.478	40.944	66.0214	87.6412	2400
	74.4285	115.349	45.5689	45.4748	62.2189	53.5793	49.2579	53.2456	91.0221	118.804	3000
	95.7669	147.885	56.6564	54.9667	75.7048	63.7066	60.4079	66.1887	118.495	153.158	3600
	119.175	182.142	67.8525	64.8267	88.7234	75.6087	72.1558	79.6086	146.883	190.956	4200
	143.067	215.807	80.4394	75.7772	101.581	85.1983	84.2898	94.396	175.957	227.015	4800
	168.591	250.957	93.5548	86.377	115.738	94.6672	96.6706	110.483	207.006	263.173	5400
	195.281	288.921	107.079	98.6559	132.177	105.115	108.855	127.296	238.574	297.696	6000
	222.681	328.011	120.127	110.757	150.188	115.592	121.592	144.917	271.759	333.4	6600
	251.812	368.568	133.466	123.425	169.651	126.476	135.633	163.325	304.63	372.807	7200
	279.986	407.339	147.964	135.644	190.363	138.507	150.003	182.903	336.654	410.804	7800
	305.991	445.747	162.831	149.071	210.234	151.077	164.276	200.79	370.694	448.573	8400
	330.307	484.07	178.374	161.697	231.109	164.525	179.053	217.991	404.571	485.499	9000
	355.23	520.366	194.892	174.168	253.63	178.7	194.794	234.604	437.547	521.274	9600
	378.092	549.147	213.255	188	276.906	193.17	210.392	250.848	470.537	556.947	10200
	394.63	579.32	229.665	201.951	300.376	208.392	225.012	266.77	508.391	591.845	10800
	409.377	604.37	247.414	215.369	325.469	222.402	239.399	282.2	545.081	627.442	11400
	423.182	629.08	266.359	228.991	351.45	235.95	252.662	296.708	582.12	661.135	12000
	435.314	656.386	286.727	242.318	377.813	250.08	266.626	312.252	622.439	691.215	12600
	446.935	686.214	305.527	255.491	402.6	262.619	281.672	328.193	665.424	723.391	13200
	460.079	711.04	323.342	269.156	425.089	271.818	296.511	345.164	701.686	755.975	13800
	471.224	733.403	340.824	282.617	449.315	282.112	311.315	362.536	738.758	790.399	14400
	482.009	753.444	360.787	295.951	474.332	293.308	325.939	379.727	778.076	824.456	15000
	489.622	775.444	379.332	312.141	499.849	304.474	340.216	393.995	817.508	849.181	15600
	500.011	793.441	399.507	328.335	527.198	319.191	354.665	408.307	854.063	866.172	16200
	512.141	812.198	420.747	347.798	553.352	333.972	368.498	420.633	889.277	882.27	16800
	525.989	830.959	445.417	368.512	578.311	347.74	382.033	432.912	919.357	889.908	17400
	539.648	848.64	469.948	390.122	603.359	361.609	396.568	445.347	947.909	895.113	18000
	554.634	862.596	492.648	415.878	628.806	373.204	408.073	457.385	974.983	898.155	18600
	566.222	877.109	514.113	439.374	653.758	385.503	420.659	467.578	1002.39	904.258	19200
	577.985	882.902	534.409	462.704	680.735	393.944	431.605	472.835	1026.42	910.608	19800
	588.198	893.709	554.122	487.649	711.008	401.632	441.438	472.952	1048.51	920.718	20400
	598.054	906.915	571.181	512.516	739.731	410.396	448.862	474.766	1068.36	942.144	21000
	608.039	925.552	591.682	540.506	772.105	419.406	456.903	474.833	1081.81	963.63	21600
	616.605	946.702	614.857	568.01	804.22	427.243	465.669	475.798	1086.93	991.313	22200
	621.865	968.703	635.671	597.022	839.973	440.039	476.125	475.482	1099.35	1021.63	22800
	631.061	989.437	656.704	622.497	875.755	455.443	489.987	474.002	1102.35	1056.18	23400
	638.222	1008.06	681.553	643.575	909.54	472.294	502.945	475.937	1104.98	1100.1	24000
	641.664	1030.56	700.543	665.56	932.921	490.315	516.455	481.261	1112.46	1141.9	24600
	644.258	1063.07	718.665	691.695	960.445	514.067	529.194	491.031	1116.56	1192.03	25200
	638.047	1114.49	738.934	718.874	986.649	536.931	541.268	507.07	1114.59	1245.18	25800
	632.899	1185.69	761.184	747.606	1007.58	565.556	547.256	528.242	1107.69	1298.03	26400
	633.823	1263.92	774.737	779.513	1035.91	593.479	552.382	552.328	1103.3	1357.69	27000
	635.011	1350.25	787.189	808.612	1065.8	622.301	554.566	578.131	1094.44	1422.82	27600
	638.304	1442.03	794.635	834.391	1093.39	647.108	562.371	604.583	1070.58	1498.91	28200
	642.44	1535.04	802.232	859.41	1126.64	677.453	570.511	630.31	1046.42	1571.82	28800
	660.138	1642.07	807.851	883.967	1154.8	695.263	577.529	661.116	1015.17	1644.83	29400
	680.354	1745.49	817.133	911.076	1179.33	712.188	587.832	695.651	984.649	1724.64	30000
	708.949	1848.94	826.788	950.695	1203.12	726.313	605.222	736.968	964.916	1812.18	30600
	738.683	1974.61	826.647	982.199	1229.76	722.457	634.408	787.468	940.648	1894.25	31200
	778.242	2091.35	834.851	1010.31	1267.36	720.464	667.131	838.192	889.551	1988.45	31800
	805.81	2205.89	840.123	1033.69	1298.75	737.151	716.066	900.436	862.494	2063.26	32400
	851.45	2350.52	849.773	1071.05	1327.57	751.823	759.097	974.533	853.99	2181.15	33000
	905.463	2506.71	872.077	1102.9	1362.05	750.682	806.344	1059.73	848.417	2272.25	33600
	972.706	2670.6	920.556	1111.65	1411.35	754.614	849.411	1175.88	851.493	2399.84	34200
	1000.54	2737.24	998.89	1129.92	1403.5	778.083	913.965	1330.16	845.948	2547.18	34800

## Sheet: MSD brain individual embryos
Figure 3K
controls	MSD of brain cells (µm2)
	control 1	control 2	control 3	control 4	control 5	Delta t (s)															Delta t (s)
	0	0	0	0	0	0															0
	10.2272	12.4149	16.5022	9.11498	9.88937	600															600
	19.778	25.3314	29.9838	18.7956	19.0887	1200															1200
	32.3356	38.6576	46.3772	29.8112	28.8844	1800															1800
	46.448	52.1488	62.6523	40.521	39.3245	2400															2400
	61.5708	65.7337	79.4348	51.3064	48.7672	3000															3000
	78.4185	81.3821	96.0547	62.1326	58.2988	3600															3600
	95.2818	97.6311	114.81	73.1884	68.8948	4200															4200
	114.366	114.191	134.192	85.3935	78.8095	4800															4800
	134.5	131.91	152.192	97.5006	88.1584	5400															5400
	155.387	150.172	171.632	110.668	97.7199	6000															6000
	177.839	167.335	192.693	124.066	107.792	6600															6600
	199.362	183.909	214.006	137.021	117.834	7200															7200
	219.69	200.485	235.333	148.884	127.733	7800															7800
	240.143	216.757	256.573	161.119	137.294	8400															8400
	260.237	232.761	278.895	173.026	146.77	9000															9000
	278.814	248.17	299.379	183.983	157.23	9600															9600
	290.053	263.008	322.22	194.779	168.382	10200															10200
	301.552	275.844	341.033	205.3	178.579	10800															10800
	309.971	288.333	358.651	215.038	186.539	11400															11400
	318.723	300.185	374.874	224.265	194.78	12000															12000
	326.134	310.972	390.155	232.426	200.651	12600															12600
	331.541	320.656	404.915	240.323	206.582	13200															13200
	338.481	329.968	418.247	247.26	209.71	13800															13800
	342.244	339.352	424.855	254.507	212.481	14400															14400
	346.076	345.115	429.358	262.032	216.212	15000															15000
	351.003	351.414	432.266	269.361	219.448	15600															15600
	353.632	357.965	440.095	277.612	226.108	16200															16200
	354.005	360.652	443.656	284.153	233.565	16800															16800
	354.946	362.8	447.979	289.508	240.421	17400															17400
	356.039	364.088	451.323	293.51	248.367	18000															18000
	354.262	366.081	452.996	297.221	255.382	18600															18600
	352.169	369.022	453.948	300.463	263.039	19200															19200
	347.985	371.322	451.706	306.648	268.912	19800															19800
	347.041	370.133	453.936	311.727	274.556	20400															20400
	344.385	366.793	451.612	316.22	278.691	21000															21000
	341.835	368.27	449.923	320.762	284.72	21600															21600
	341.127	368.953	457.205	325.865	290.074	22200															22200
	339.695	367.434	462.045	330.378	297.436	22800															22800
	337.309	366.139	471.829	335.371	309.041	23400															23400
	337.909	363.157	473.856	342.119	320.891	24000															24000
	332.239	362.452	480.966	349.237	335.455	24600															24600
	332.437	360.572	481.942	353.383	347.634	25200															25200
	331.931	361.544	487.11	358.049	358.344	25800															25800
	337.946	359.877	491.478	365.638	369.302	26400															26400
	349.549	359.153	500.01	377.203	378.837	27000															27000
	360.728	356.172	515.502	388.096	392.217	27600															27600
	379.191	354.901	530.813	401.536	405.671	28200															28200
	397.486	355.464	553.869	412.121	424.949	28800															28800
	416.422	359.472	579.049	427.105	448.2	29400															29400
	431.077	368.787	600.702	444.516	470.948	30000															30000
	444.161	378.758	623.758	463.596	507.827	30600															30600
	457.024	378.861	651.255	488.05	550.265	31200															31200
	470.527	390.947	688.798	501.892	592.592	31800															31800
	488.266	397.855	736.906	502.338	646.963	32400															32400
	515.242	408.234	817.554	511.381	699.223	33000															33000
	553.933	421.412	885.705	519.118	769.082	33600															33600
	604.636	428.612	968.586	533.683	854.477	34200															34200
	664.961	474.536	1032.78	573.873	946.581	34800															34800
mutants	MSD of brain cells (µm2)
	mutant 1	mutant 2	mutant 3	mutant 4	mutant 5	Delta t (s)
	0	0	0	0	0	0
	14.995	13.0492	15.2486	12.4257	18.9296	600
	34.2561	25.596	29.383	26.1774	38.6944	1200
	58.3685	38.8177	45.3096	40.0178	62.0991	1800
	85.3748	51.4425	62.46	54.7188	89.0598	2400
	116.072	62.4221	81.4196	69.4319	120.735	3000
	150.83	73.4227	102.6	83.8545	154.139	3600
	188.993	83.0636	124.891	97.3463	191.328	4200
	228.753	92.9159	148.328	112.769	231.925	4800
	272.147	103.152	172.903	128.132	275.095	5400
	317.872	113.845	199.619	142.904	321.408	6000
	363.539	124.984	228.657	158.774	369.127	6600
	411.431	137.634	254.639	175.647	415.863	7200
	458.424	147.254	281.964	191.573	461.914	7800
	504.979	156.381	311.002	207.458	506.985	8400
	552.297	166.085	341.774	221.447	553.466	9000
	596.865	175.124	373.499	233.448	602.207	9600
	638.663	184.894	402.447	246.684	648.546	10200
	677.38	194.811	430.678	259.702	696.059	10800
	715.286	203.553	457.997	271.538	740.745	11400
	752.267	213.124	486.766	282.35	784.633	12000
	788.317	220.435	508.563	294.5	822.055	12600
	824.377	225.696	528.425	304.416	856.332	13200
	861.546	229.894	547.629	312.615	880.537	13800
	898.216	234.77	563.324	318.844	903.771	14400
	934.532	241.214	575.249	326.047	922.845	15000
	970.86	247.454	586.935	333.321	936.498	15600
	1008.02	254.064	598.089	339.616	945.999	16200
	1045.56	263.972	607.538	347.447	952.041	16800
	1086.55	273.749	616.408	355.847	954.785	17400
	1128.38	284.442	621.609	364.279	955.158	18000
	1165.15	295.387	622.297	372.55	956.575	18600
	1201.92	305.476	629.1	381.615	952.027	19200
	1236.47	317.741	630.531	388.628	942.364	19800
	1269.01	327.454	633.506	393.764	935.921	20400
	1299.95	337.452	630.814	398.788	932.857	21000
	1330.12	347.603	627.934	404.365	934.208	21600
	1364.37	356.523	629.786	408.418	937.02	22200
	1398.71	363.387	628.517	413.617	940.898	22800
	1438.09	373.226	629.882	418.264	940.895	23400
	1476.58	386.656	635.273	420.786	955.083	24000
	1523.75	397.584	643.164	425.419	969.645	24600
	1579.2	407.162	653.284	430.133	991.855	25200
	1657.37	413.96	661.95	434.213	1022.85	25800
	1749.75	414.049	673.834	435.68	1060.59	26400
	1849.41	417.289	681.51	436.69	1106.83	27000
	1963.37	417.066	689.445	438.429	1160.23	27600
	2077.61	413.594	714.207	442.692	1218.95	28200
	2186.86	417.803	740.066	444.457	1277.32	28800
	2309.54	426.285	761.299	451.201	1356.91	29400
	2425.91	437.768	790.623	458.953	1441.69	30000
	2568.35	451.346	832.429	470.229	1536.69	30600
	2721.61	458.028	858.962	487.664	1645.08	31200
	2859.5	479.405	895.022	503.524	1735.06	31800
	3006.55	490.242	938.635	513.334	1817.96	32400
	3137.93	499.94	1018.79	540.415	1935.91	33000
	3284.6	492.621	1123.16	584.232	2032.73	33600
	3446.68	514.749	1210.31	632.415	2142.15	34200
	3535.59	571.392	1275.74	712.899	2228.76	34800

## Sheet: cell dispacements
Figure 3L	Lateral displacement of OP cells (µm)				Figure 3M	Ventral displacement of OP cells (µm)
	controls	mutants				controls	mutants
	21.0165	13.7775				8.85651	6.79951
	12.2363	18.1644				-5.19963	3.95298
	16.0193	5.74454				2.2665	-3.06645
	15.3454	4.11633				11.7325	14.1323
	10.28	17.4468				15.9989	11.2849
Figure 3N	Anterior displacement of anterior OP cells (µm)				Figure 3O	Anterior displacement of central OP cells (µm)				Figure 3P	Anterior displacement of posterior OP cells (µm)
	controls	mutants				controls	mutants				controls	mutants
	-16.5042	8.35167				-5.77299	15.524				11.8682	45.4225
	-30.8244	-19.8138				-12.5321	9.36423				24.5194	38.764
	-26.8546	-17.0468				4.02818	5.692				20.0825	53.3458
	-20.6195	10.079				-8.39913	31.667				44.4927
	4.22226	-9.83681				30.2671	8.9288
