# Supplementary material for: Basement membranes are crucial for proper olfactory placode shape, position and boundary with the brain, and for olfactory axon development
Source: eLife. 2024 Dec 23;12:RP92004. doi: 10.7554/eLife.92004 (PMC11666240; doi:10.7554/eLife.92004)
Supplement: Figure 4—figure supplement 1—source data 1. [file elife-92004-fig4-figsupp1-data1.xlsx]

## Sheet: OP dimensions at 24 hpf
	Figure 4-figure supplement 1B					Figure 4-figure supplement 1C					Figure 4-figure supplement 1D
	AP dimension of the left OP (µm)					ML dimension of the left OP (µm)					DV dimension of the left OP (µm)
	controls	mutants				controls	mutants				controls	mutants
	62.439	61.4319				47.138	55.0745				64.2136	65.1756
	55.3895	50.3541				42.328	47.8595				75.2766	85.6181
	52.3682	44.3116				42.328	34.632				66.6186	65.1756
	52.3682	66.4673				50.2645	42.328				69.2641	60.3656
	32.2266	42.2974				29.822	39.6825				53.391	69.9856
	48.3399	35.2478				39.442	36.3155				59.163	73.1121
	38.2691	46.3257				44.252	38.48				53.872	80.5676
	45.3186	51.3611				45.695	41.366				56.0365	79.1246
	54.3824	48.3399				53.6315	38.48				53.872	65.4161
	52.3682	60.4249				43.771	32.227				48.581	66.3781

## Sheet: OP dimensions at 28 hpf
	Figure 4-figure supplement 1F					Figure 4-figure supplement 1G					Figure 4-figure supplement 1H
	AP dimension of the left OP (µm)					ML dimension of the left OP (µm)					DV dimension of the left OP (µm)
	controls	mutants				controls	mutants				controls	mutants
	44.3116	51.3611				44.252	50.7455				64.4541	87.5421
	46.3257	47.3328				49.062	27.898				60.1251	76.4791
	52.3682	47.3328				47.138	41.1255				61.5681	62.5301
	40.2832	53.3753				49.3025	56.0365				48.581	87.0611
	48.3399	68.4815				57.239	36.556				68.3021	77.6816
	58.4107	64.4532				57.239	42.328				73.3526	57.4795
	58.4107	50.3541				60.1251	38.7205				69.0236	86.0991
	51.3611	46.3257				48.8215	44.733				55.796	74.3146
	56.3965	50.3541				42.809	44.733				45.4545	70.2261
	56.3965	57.4036				42.5685	44.4925				68.5426	63.9731
	44.3116					52.1885					60.6061
	48.3399					50.986					75.7576
	55.3895					58.4415					62.7706

## Sheet: OP dimensions at 32 hpf
	Figure 4-figure supplement 1J					Figure 4-figure supplement 1K					Figure 4-figure supplement 1L
	AP dimension of the left OP (µm)					ML dimension of the left OP (µm)					DV dimension of the left OP (µm)
	controls	mutants				controls	mutants				controls	mutants
	59.4178	50.3541				47.8595	46.176				72.3906	91.3901
	55.3895	56.3965				44.0115	52.91				64.2136	78.8841
	55.3895	50.3541				62.5301	54.834				76.4791	81.2891
	62.439	52.3682				56.0365	48.8215				73.5931	71.4286
	50.3541	43.3045				56.5175	64.9351				72.1501	81.5296
	53.3753	53.3753				43.5305	49.543				60.1251	91.6306
	52.3682	45.3186				43.29	47.619				65.6566	73.8336
	58.4107	48.3399				50.986	53.872				75.2766	75.7576
	45.3186	52.3682				53.1505	43.29				72.3906	76.9601
	37.262	47.3328				54.5935	48.1				66.6186	83.2131
	50.3541	43.3045				47.8595	45.9355				66.6186	72.1501
	55.3895	46.3257				69.2641	61.8086				66.3781	68.5426
	44.3116	36.2549				63.4921	54.1125				66.3781	79.8461
	46.3257					53.391					69.7451
	49.347					62.0491					64.6946
	46.3257					63.9731					58.9225
	58.4107					52.1885					64.2136
