# Supplementary material for: Basement membranes are crucial for proper olfactory placode shape, position and boundary with the brain, and for olfactory axon development
Source: eLife. 2024 Dec 23;12:RP92004. doi: 10.7554/eLife.92004 (PMC11666240; doi:10.7554/eLife.92004)
Supplement: Figure 4—source data 1. [file elife-92004-fig4-data1.xlsx]

## Sheet: OP dimensions at 36 hpf
Figure 4C	AP dimension of the left OP (µm)				Figure 4D	ML dimension of the left OP (µm)				Figure 4E	DV dimension of the left OP (µm)
	controls	mutants				controls	mutants				controls	mutants
	72.5098	58.4107				44.4925	40.1635				60.6061	88.0231
	58.4107	38.2691				43.5305	47.619				64.4541	79.3651
	48.3399	45.3186				58.9225	47.3785				74.7956	89.9471
	61.4319	56.3965				59.644	52.6695				71.4286	72.1501
	57.4036	49.347				48.581	60.1251				73.1121	73.5931
	71.5028	44.3116				58.201	61.8086				70.4666	65.6566
	50.3541	55.3895				66.6186	42.5685				71.1881	95.2381
	53.3753	53.3753				53.391	45.695				55.796	68.0616
	47.3328	54.3824				54.834	52.91				66.3781	66.3781
	47.3328					51.2265					58.4415
	55.3895					56.758					74.3146
	52.3682					65.6566					78.4031
	66.4673					54.834					85.6181
	48.3399					64.4541					70.9476
	54.3824					55.5555					67.0996

## Sheet: mean MSD
Figure 4M
controls	MSD of placode cells (µm2)	Delta t (s)		mutants	MSD of placode cells (µm2)	Delta t (s)
	0	0			0	0
	3.94065	600			4.52364	600
	6.99386	1200			8.74893	1200
	10.4894	1800			13.5076	1800
	14.5482	2400			18.9139	2400
	19.1979	3000			24.822	3000
	24.3631	3600			31.2131	3600
	29.9945	4200			38.146	4200
	36.1024	4800			45.802	4800
	42.7355	5400			53.9999	5400
	49.7557	6000			62.6877	6000
	56.9835	6600			71.5857	6600
	64.766	7200			81.0226	7200
	73.1183	7800			91.0242	7800
	81.7471	8400			101.254	8400
	90.7632	9000			112.092	9000
	100.165	9600			123.394	9600
	109.904	10200			134.892	10200
	120.113	10800			147.004	10800
	130.754	11400			159.459	11400
	141.841	12000			172.296	12000
	153.31	12600			185.868	12600
	165.123	13200			199.682	13200
	177.527	13800			213.955	13800
	190.317	14400			228.622	14400
	203.634	15000			243.341	15000
	217.378	15600			258.786	15600
	231.311	16200			274.655	16200
	245.56	16800			290.941	16800
	259.948	17400			307.743	17400
	274.604	18000			324.951	18000
	289.561	18600			342.283	18600
	304.851	19200			359.928	19200
	320.394	19800			377.973	19800
	335.984	20400			396.168	20400
	351.904	21000			414.932	21000
	368.298	21600			434.046	21600
	384.845	22200			453.243	22200
	401.576	22800			473.002	22800
	418.176	23400			492.764	23400
	435.161	24000			512.872	24000
	452.387	24600			533.19	24600
	469.569	25200			553.989	25200
	487.093	25800			575.405	25800
	504.568	26400			596.305	26400
	522.224	27000			617.131	27000
	539.825	27600			638.502	27600
	557.68	28200			660.76	28200
	575.401	28800			683.75	28800
	593.093	29400			707.61	29400
	610.705	30000			731.494	30000
	627.928	30600			755.967	30600
	645.125	31200			780.58	31200
	662.322	31800			805.312	31800
	679.393	32400			830.699	32400
	696.154	33000			856.693	33000
	712.371	33600			883.963	33600
	728.639	34200			911.261	34200
	744.462	34800			938.457	34800
	759.823	35400			965.666	35400
	775.072	36000			991.786	36000
	790.254	36600			1018.8	36600
	805.257	37200			1046.31	37200
	820.662	37800			1075.33	37800
	835.477	38400			1104.73	38400
	850.66	39000			1134.28	39000
	865.581	39600			1163.74	39600
	881.43	40200			1193.58	40200
	897.751	40800			1224.32	40800
	913.634	41400			1255.7	41400
	928.911	42000			1287.03	42000
	944.077	42600			1317.74	42600
	959.698	43200			1349.2	43200
	975.035	43800			1380.09	43800
	990.587	44400			1410.66	44400
	1006.24	45000			1441.53	45000
	1021.19	45600			1471.3	45600
	1036.85	46200			1501.53	46200
	1051.52	46800			1532.74	46800
	1066.15	47400			1561.86	47400
	1080.07	48000			1591.32	48000
	1094.8	48600			1620.96	48600
	1108.02	49200			1651.22	49200
	1121.98	49800			1681.64	49800
	1136.34	50400			1713.81	50400
	1150.19	51000			1743.46	51000
	1162.85	51600			1771.68	51600
	1175.02	52200			1801.02	52200
	1185.88	52800			1829.95	52800
	1195.55	53400			1861.02	53400
	1204.77	54000			1890.94	54000
	1214.42	54600			1919.77	54600
	1224.7	55200			1944.75	55200
	1235.7	55800			1968.09	55800
	1246.89	56400			1994.88	56400
	1255.12	57000			2024.48	57000
	1264.02	57600			2050.79	57600
	1273.31	58200			2081.41	58200
	1278.88	58800			2111.31	58800
	1282.23	59400			2136.8	59400
	1284.56	60000			2160.21	60000
	1290.32	60600			2177.79	60600
	1301.23	61200			2196.64	61200
	1308.67	61800			2207.84	61800
	1320.32	62400			2224.54	62400
	1326.9	63000			2246.68	63000
	1343.23	63600			2260.29	63600
	1355.58	64200			2299.18	64200
Figure 4N
controls	MSD of brain cells (µm2)	Delta t (s)		mutants	MSD of brain cells (µm2)	Delta t (s)
	0	0			0	0
	5.31935	600			6.00097	600
	9.50911	1200			10.8571	1200
	13.9882	1800			16.0642	1800
	18.7982	2400			21.7444	2400
	24.252	3000			27.6974	3000
	29.6417	3600			34.1103	3600
	35.5453	4200			40.9479	4200
	41.9343	4800			48.265	4800
	48.6582	5400			55.9531	5400
	55.3263	6000			64.2382	6000
	62.4726	6600			73.0138	6600
	69.7685	7200			82.2438	7200
	77.4733	7800			91.9662	7800
	85.4134	8400			101.974	8400
	93.5975	9000			112.589	9000
	101.975	9600			123.613	9600
	110.643	10200			134.765	10200
	119.534	10800			146.513	10800
	129.099	11400			158.539	11400
	138.619	12000			170.842	12000
	148.582	12600			183.693	12600
	159.035	13200			197.096	13200
	169.785	13800			210.866	13800
	180.756	14400			224.712	14400
	192.002	15000			239.094	15000
	203.406	15600			253.462	15600
	214.717	16200			268.215	16200
	226.289	16800			283.191	16800
	238.12	17400			298.201	17400
	250.292	18000			313.379	18000
	262.61	18600			328.614	18600
	275.08	19200			344.313	19200
	287.96	19800			360.575	19800
	300.825	20400			376.592	20400
	313.983	21000			392.805	21000
	327.708	21600			409.483	21600
	341.808	22200			426.626	22200
	356.171	22800			443.75	22800
	370.601	23400			461.526	23400
	385.029	24000			478.929	24000
	399.91	24600			496.371	24600
	414.887	25200			514.229	25200
	430.204	25800			531.94	25800
	445.733	26400			549.635	26400
	461.104	27000			567.633	27000
	476.713	27600			585.607	27600
	491.911	28200			604.102	28200
	506.842	28800			622.876	28800
	521.938	29400			642.223	29400
	537.373	30000			661.251	30000
	552.739	30600			680.349	30600
	567.787	31200			699.497	31200
	582.842	31800			718.728	31800
	598.094	32400			737.82	32400
	613.158	33000			757.038	33000
	628.34	33600			777.147	33600
	643.543	34200			797.325	34200
	658.964	34800			817.253	34800
	674.704	35400			837.876	35400
	690.026	36000			857.038	36000
	706.064	36600			876.573	36600
	721.864	37200			896.535	37200
	736.947	37800			916.009	37800
	751.429	38400			936.103	38400
	766.353	39000			956.122	39000
	781.559	39600			976.534	39600
	797.415	40200			995.264	40200
	813.266	40800			1014.88	40800
	828.639	41400			1034.67	41400
	843.245	42000			1054.71	42000
	857.786	42600			1074.67	42600
	872.789	43200			1093.81	43200
	886.525	43800			1114.95	43800
	901.264	44400			1135.37	44400
	915.824	45000			1157.46	45000
	930.588	45600			1179.49	45600
	944.369	46200			1201.53	46200
	958.94	46800			1222.95	46800
	971.872	47400			1243.1	47400
	984.136	48000			1262.82	48000
	995.317	48600			1281.46	48600
	1005.32	49200			1299.78	49200
	1014.98	49800			1317.69	49800
	1024.71	50400			1336.17	50400
	1034.29	51000			1352.04	51000
	1043.92	51600			1366.78	51600
	1052.39	52200			1382.75	52200
	1060.64	52800			1398.97	52800
	1070.54	53400			1418.02	53400
	1078.99	54000			1435.6	54000
	1087.55	54600			1452.38	54600
	1095.56	55200			1467.62	55200
	1108.17	55800			1482.81	55800
	1118.98	56400			1496.21	56400
	1127.68	57000			1511.61	57000
	1137.03	57600			1530.32	57600
	1146.45	58200			1548.64	58200
	1153.49	58800			1570.52	58800
	1154.6	59400			1590.27	59400
	1156.16	60000			1609.35	60000
	1156.21	60600			1628.7	60600
	1159.72	61200			1638.26	61200
	1163.07	61800			1648.1	61800
	1172.74	62400			1663.13	62400
	1181.05	63000			1691.43	63000
	1187.87	63600			1712.88	63600
	1221.5	64200			1763.55	64200

## Sheet: MSD placode individual embryos
Figure 4M
controls	MSD of placode cells (µm2)
	control 1 placode 1	control 1 placode 2	control 2 placode 1	control 2 placode 2	control 3 placode 1	control 3 placode 2	control 4 placode 1	control 4 placode 2	Delta t (s)												Delta t (s)
	0	0	0	0	0	0	0	0	0												0
	4.29839	4.47425	3.35705	3.70698	3.50644	3.24199	4.2308	4.70932	600												600
	7.96714	7.49133	5.96928	7.27217	5.52176	5.59003	7.61906	8.52009	1200												1200
	12.4051	11.1711	9.01895	11.3033	7.3516	7.37191	11.8542	13.4388	1800												1800
	17.2163	15.2692	12.7195	15.7929	10.0472	9.31015	16.5237	19.5069	2400												2400
	22.8436	20.1243	17.0402	20.9404	12.5699	11.6926	21.8686	26.5033	3000												3000
	29.4921	25.3423	22.2033	26.3684	15.2493	14.3234	27.7009	34.2249	3600												3600
	36.884	30.133	27.7487	32.4511	18.4791	17.2713	34.4424	42.546	4200												4200
	44.9359	35.2365	33.8105	39.1734	21.5375	20.418	41.9352	51.7723	4800												4800
	53.7155	40.8282	40.6231	46.7031	24.4374	23.7224	50.1825	61.672	5400												5400
	62.9331	46.5727	48.1762	54.5116	27.5325	27.0603	59.1376	72.1213	6000												6000
	72.436	52.5683	55.9484	62.7607	30.2526	30.2901	68.6033	83.0085	6600												6600
	82.4177	58.8544	64.3513	71.6088	33.2828	33.9901	79.1347	94.4885	7200												7200
	92.7327	65.5475	73.0636	81.2085	36.3622	38.1312	90.6697	107.231	7800												7800
	103.32	71.8881	82.3498	91.3135	39.5162	42.2337	103.01	120.346	8400												8400
	114.489	78.8268	92.0954	102.049	42.205	46.5581	115.902	133.98	9000												9000
	125.656	85.5854	102.338	113.341	45.305	51.0238	129.261	148.811	9600												9600
	137.384	91.374	113.423	125.331	48.7483	55.5638	143.449	163.961	10200												10200
	149.54	98.3987	124.986	137.632	52.1222	60.0231	158.342	179.863	10800												10800
	162.399	105.47	136.856	150.267	55.469	65.1218	173.572	196.874	11400												11400
	175.692	112.472	149.04	163.468	59.3548	70.2684	189.269	215.166	12000												12000
	189.168	120.155	161.565	177.534	62.693	75.3397	205.904	234.119	12600												12600
	202.408	128.127	174.182	191.736	66.5047	80.4684	223.296	254.261	13200												13200
	216.32	137.027	187.189	205.947	70.5637	85.8391	241.479	275.851	13800												13800
	230.756	145.899	200.451	220.712	74.3611	91.5675	260.472	298.317	14400												14400
	245.376	154.396	214.444	235.972	78.7198	97.4258	280.672	322.067	15000												15000
	260.594	163.352	228.516	251.79	83.1965	103.418	301.241	346.916	15600												15600
	275.688	172.268	242.781	268.13	87.6568	109.255	322.58	372.13	16200												16200
	291.213	181.772	257.252	284.89	91.7897	115.306	344.282	397.977	16800												16800
	307.588	191.383	271.672	301.452	95.9895	121.468	366.033	424	17400												17400
	324.071	201.18	285.936	318.604	100.254	127.724	388.574	450.486	18000												18000
	340.667	211.244	299.987	336.337	104.638	134.012	411.585	478.018	18600												18600
	357.394	221.669	313.722	354.03	109.469	140.823	435.203	506.501	19200												19200
	374.639	233.078	326.822	371.249	114.489	147.693	459.509	535.67	19800												19800
	392.774	243.602	339.798	388.464	119.395	154.451	483.949	565.44	20400												20400
	410.715	255.141	352.783	405.8	124.576	161.43	508.447	596.342	21000												21000
	429.273	267.605	366.078	423.46	130.303	168.147	533.691	627.827	21600												21600
	448.252	280.556	378.749	440.778	136.753	175.002	559.33	659.343	22200												22200
	467.346	293.86	391.498	457.658	142.892	182.049	585.763	691.54	22800												22800
	486.162	306.821	403.769	474.093	149.564	188.765	611.657	724.576	23400												23400
	505.176	320.583	416.697	490.168	156.547	195.661	638.288	758.171	24000												24000
	525.063	335.034	429.033	506.045	163.936	202.734	665.136	792.117	24600												24600
	544.725	348.907	440.693	521.456	170.946	209.915	693.025	826.887	25200												25200
	564.599	363.021	452.226	536.229	178.31	217.668	721.23	863.462	25800												25800
	584.057	376.603	463.462	551.527	185.693	225.427	749.921	899.853	26400												26400
	604.655	390.964	474.516	566.542	192.938	232.837	779.317	936.022	27000												27000
	625.858	405.068	484.361	581.016	200.908	239.977	809.14	972.273	27600												27600
	647.556	419.396	494.122	596.039	208.871	247.266	839.826	1008.36	28200												28200
	668.399	432.671	504.135	611.089	217.23	254.61	871.701	1043.37	28800												28800
	688.484	446.084	514.466	625.731	225.633	262.032	904.697	1077.62	29400												29400
	708.56	459.233	525.196	640.73	233.155	269.182	937.566	1112.02	30000												30000
	728.607	470.786	535.555	655.162	241.097	276.606	969.744	1145.87	30600												30600
	749.028	482.241	545.499	670.27	248.969	283.551	1001.93	1179.51	31200												31200
	768.374	494.045	555.908	684.673	257.002	290.301	1035.58	1212.69	31800												31800
	787.759	505.316	565.488	698.112	264.719	297.801	1069.68	1246.27	32400												32400
	806.581	516.949	575.445	711.071	272.731	305.583	1103.25	1277.62	33000												33000
	826.066	527.442	584.523	723.856	280.06	313.198	1136.3	1307.53	33600												33600
	844.539	537.728	594.184	737.3	287.676	321.264	1168.16	1338.26	34200												34200
	862.137	549.047	604.385	748.665	295.56	328.578	1199.31	1368.01	34800												34800
	879.674	559.262	614.626	759.958	303.412	336.17	1229.48	1396	35400
	897.303	567.576	625.668	769.375	310.642	343.771	1261.11	1425.13	36000
	913.681	577.404	635.915	780.267	317.349	350.893	1291.06	1455.46	36600
	929.775	586.836	646.742	790.312	324.555	357.772	1320.5	1485.56	37200
	946.399	596.137	659.162	800.857	332.367	363.721	1349.76	1516.89	37800
	964.998	606.148	671.291	810.766	340.135	369.165	1375.41	1545.9	38400
	983.891	616.682	683.436	819.566	348.226	374.247	1401.97	1577.26	39000
	1003.22	628.113	695.647	828.349	356.395	379.23	1426.61	1607.08	39600
	1025.84	639.38	709.332	838.588	364.609	385.374	1449.82	1638.5	40200
	1049.96	650.137	724.556	850.373	373.3	392.146	1472.15	1669.39	40800
	1076.01	659.889	738.739	862.515	381.217	398.087	1492.81	1699.81	41400
	1102.91	669.061	752.89	874.109	389.64	403.944	1511.22	1727.52	42000
	1130.63	679.744	766.501	885.298	397.941	409.551	1527.96	1755	42600
	1158.9	690.37	781.702	896.868	406.51	415.523	1545.12	1782.59	43200
	1190.53	700.731	796.175	907.977	416.005	422.164	1560.25	1806.44	43800
	1221.76	708.093	811.835	919.488	426.688	427.865	1574.81	1834.16	44400
	1254.98	714.06	828.234	931.502	438.795	434.365	1587.93	1860.04	45000
	1288.92	718.74	844.539	943.012	451.275	439.26	1599.24	1884.5	45600
	1326.96	721.344	861.224	954.717	462.869	444.193	1613.96	1909.54	46200
	1363.91	721.391	877.682	964.121	476.422	449.122	1626.17	1933.33	46800
	1400.19	722.222	897.143	975.127	488.796	454.287	1638.17	1953.27	47400
	1433.74	721.601	917.379	981.612	501.785	459.798	1651.44	1973.19	48000
	1468.88	721.27	938.601	989.697	516.536	464.616	1666.8	1992.03	48600
	1505.12	717.826	958.516	999.438	529.682	468.199	1679.37	2006.05	49200
	1540.42	716.921	980.563	1010.07	543.041	471.663	1691.3	2021.83	49800
	1577.25	715.199	1003.09	1020.69	554.526	476.751	1707.73	2035.48	50400
	1606.41	717.608	1026.24	1029.41	571.665	482.187	1718.49	2049.5	51000
	1632.91	715.88	1048.94	1035.87	588.663	486.241	1728.55	2065.78	51600
	1664.31	712.561	1071.67	1045.35	605.46	489.816	1731.08	2079.93	52200
	1693.06	707.004	1091.12	1052.31	625.272	497.039	1731.92	2089.29	52800
	1717.81	699.39	1109.95	1061.62	641.866	503.436	1737.94	2092.4	53400
	1741.75	694.204	1128.37	1071.44	658.739	509.55	1742.14	2091.94	54000
	1766.54	686.067	1146.05	1079.97	678.019	517.541	1750.15	2091	54600
	1796.41	682.114	1163.64	1081.88	697.116	525.957	1755.26	2095.2	55200
	1823.76	674.144	1179.47	1088.33	719.775	533.317	1759.63	2107.19	55800
	1848.12	670.802	1189.95	1095.93	750.23	539.292	1760.49	2120.29	56400
	1866.15	667.208	1203.8	1104.27	774.38	542.432	1759.34	2123.36	57000
	1879.06	665.084	1219.97	1115.94	797.139	550.059	1756.67	2128.23	57600
	1892.44	667.494	1241.88	1130.18	827.796	558.831	1748.73	2119.1	58200
	1903.02	666.448	1263.31	1142.65	855.89	565.731	1724.73	2109.24	58800
	1904.22	666.488	1280.8	1150.61	879.092	567.246	1699.25	2110.16	59400
	1907.39	670.243	1299.35	1163.71	902.198	568.799	1671.76	2093.03	60000
	1892.13	688.561	1327.91	1173.96	912.29	572.693	1668.69	2086.35	60600
	1894.5	706.288	1358.55	1189.87	935.191	577.01	1657.09	2091.34	61200
	1886.33	720.605	1390.94	1212.06	955.267	577.537	1631.14	2095.49	61800
	1869.29	728.768	1418.32	1243.55	973.582	583.946	1626.54	2118.58	62400
	1837.2	731.534	1436.93	1269.13	981.95	579.815	1621.39	2157.24	63000
	1817.85	755.285	1470.82	1315.65	985.182	586.473	1604.59	2210	63600
	1779.76	769.505	1537.58	1337.33	997.554	578.388	1636.07	2208.45	64200
mutants	mutant 1 placode 1	mutant 1 placode 2	mutant 2 placode 1	mutant 2 placode 2	mutant 3 placode 1	mutant 3 placode 2	Delta t (s)
	0	0	0	0	0	0	0
	4.8115	5.55941	4.55681	4.69558	3.82225	3.6963	600
	8.90975	10.4005	9.6686	8.97587	7.4568	7.08208	1200
	13.5588	15.7109	15.4878	13.7356	11.5793	10.9735	1800
	18.6426	21.7936	22.135	19.5003	16.086	15.3261	2400
	24.0874	28.619	29.2333	25.6112	21.1434	20.238	3000
	29.9619	36.187	36.5662	32.4542	26.7748	25.3347	3600
	35.7942	44.1319	44.9214	40.4346	32.5433	31.0504	4200
	41.5996	53.2419	54.2222	49.6698	39.0424	37.0362	4800
	47.7901	62.4223	64.6618	59.7937	45.9267	43.4051	5400
	54.0001	72.4854	76.0675	70.1928	53.22	50.1602	6000
	60.0929	82.9717	87.8028	80.811	60.8532	56.9825	6600
	66.7874	94.5369	100.076	91.9996	68.7544	63.9814	7200
	73.7194	106.82	112.815	104.236	77.113	71.4416	7800
	80.4472	118.972	126.349	116.44	86.0063	79.3099	8400
	87.3158	132.153	141.032	129.405	95.348	87.2974	9000
	94.9486	145.856	156.083	142.698	105.362	95.4124	9600
	102.549	159.769	171.078	156.485	115.792	103.676	10200
	110.576	174.836	186.735	170.951	126.727	112.196	10800
	119.046	190.378	202.6	185.689	138.088	120.953	11400
	127.78	206.173	219.11	200.935	149.565	130.216	12000
	137.304	222.659	236.291	217.038	161.597	140.316	12600
	146.732	239.602	253.644	233.494	174.259	150.363	13200
	157.23	256.672	271.262	249.965	187.778	160.826	13800
	167.776	273.919	289.915	267.009	201.679	171.432	14400
	178.684	291.499	308.649	283.369	215.599	182.244	15000
	189.691	309.703	328.759	301.061	229.832	193.67	15600
	201.447	328.115	349.215	318.826	244.451	205.872	16200
	213.281	347.219	369.51	336.923	260.075	218.638	16800
	224.876	367.054	390.279	355.571	276.406	232.271	17400
	236.21	388.314	410.964	374.282	293.802	246.135	18000
	247.617	410.291	431.431	392.976	311.137	260.249	18600
	259.937	433.383	451.365	411.835	328.544	274.503	19200
	271.801	456.984	472.162	430.784	346.942	289.164	19800
	283.993	480.014	493.184	450.062	365.598	304.158	20400
	296.131	503.244	515.393	469.363	385.672	319.788	21000
	307.81	526.818	538.001	489.242	406.99	335.412	21600
	318.495	550.289	560.776	509.271	429.523	351.106	22200
	329.748	574.651	584.067	529.287	452.567	367.691	22800
	340.647	599.522	606.769	548.97	476.281	384.397	23400
	351.707	625.394	629.154	568.147	501.45	401.385	24000
	362.661	651.419	652.104	588.028	526.632	418.299	24600
	373.01	678.705	675.835	609.477	551.247	435.658	25200
	384.411	706.85	699.235	631.526	577.052	453.359	25800
	395.083	734.883	721.262	654.027	601.976	470.6	26400
	406.307	763.176	742.601	676.269	627.323	487.11	27000
	418.246	792.109	764.333	699.686	652.928	503.71	27600
	431.446	823.603	786.144	722.968	678.711	521.686	28200
	444.465	854.58	810.312	749.15	704.759	539.236	28800
	457.96	886.414	835.584	777.671	731.092	556.942	29400
	470.612	917.931	861.689	806.913	756.88	574.941	30000
	484.094	950.361	887.837	836.406	783.288	593.817	30600
	498.397	983.473	913.591	865.719	809.364	612.937	31200
	512.054	1016.69	941.468	894.299	834.73	632.629	31800
	525.841	1049.94	971.835	923.937	859.923	652.723	32400
	539.037	1081.7	1005.22	953.954	886.644	673.596	33000
	553.357	1113.77	1041.52	985.649	913.795	695.683	33600
	566.92	1145.33	1080.52	1017.43	939.344	718.027	34200
	581.447	1176.78	1120.01	1048.8	963.127	740.582	34800
	595.845	1209.47	1159.66	1080.02	985.35	763.65	35400
	608.734	1240.03	1199.35	1111.39	1005.33	785.878	36000
	620.796	1270.84	1240.77	1144.94	1026.46	808.97	36600
	633.521	1298.46	1282.88	1182.34	1047.9	832.773	37200
	646.497	1328.83	1326.38	1221.2	1070.07	858.998	37800
	659.981	1358.82	1370.63	1261.59	1091.14	886.208	38400
	672.763	1387.99	1416.21	1302.43	1113.01	913.256	39000
	687.039	1418.06	1459.69	1343.88	1134.14	939.647	39600
	702.322	1448.85	1504.1	1385.79	1155.34	965.107	40200
	717.066	1481.81	1550.56	1429.91	1176.75	989.844	40800
	733.146	1515.34	1598.21	1474.67	1198.09	1014.76	41400
	747.807	1549.86	1646.45	1517.62	1220.55	1039.91	42000
	762.446	1583.83	1693.59	1561.03	1242.31	1063.25	42600
	777.795	1618.02	1742.38	1605.33	1265.05	1086.6	43200
	793.094	1651.4	1790.69	1648.8	1287.48	1109.11	43800
	805.93	1683.34	1840.44	1693.75	1310.26	1130.22	44400
	816.616	1711.31	1893.59	1741.56	1334.22	1151.88	45000
	826.647	1736.49	1946.04	1789.65	1357.92	1171.08	45600
	837.782	1762.87	1997.44	1838.8	1382.74	1189.52	46200
	851.481	1795.57	2047.63	1889.97	1404.04	1207.76	46800
	861.96	1828.27	2095.21	1939.57	1422.08	1224.08	47400
	874.86	1868.03	2141.36	1987.34	1440.77	1235.55	48000
	884.58	1907.03	2190.97	2033.95	1461.95	1247.31	48600
	896.865	1950.34	2238.34	2076.97	1484.13	1260.67	49200
	909.162	1991.01	2285.48	2120.21	1507.84	1276.11	49800
	925.915	2027.67	2336.74	2169.02	1532.63	1290.88	50400
	944.383	2060.45	2380.09	2214.76	1556.71	1304.36	51000
	962.704	2087.95	2425.52	2257.62	1582.15	1314.14	51600
	981.758	2115.75	2469.54	2296.97	1614.67	1327.45	52200
	998.104	2144.77	2516.7	2334.44	1641.3	1344.38	52800
	1013.86	2172.41	2567.73	2374.43	1668.61	1369.07	53400
	1025.25	2198.91	2617.75	2416.78	1690.48	1396.45	54000
	1037.16	2223.47	2665.97	2456.89	1708.24	1426.9	54600
	1043.85	2239	2705.82	2494.84	1722.93	1462.07	55200
	1051.31	2251.12	2742.31	2535.43	1735.14	1493.25	55800
	1063.46	2268.66	2781.24	2581.48	1752.76	1521.69	56400
	1083.87	2284.47	2824.39	2636	1773.4	1544.78	57000
	1094.14	2296.8	2869.12	2680.68	1792.59	1571.38	57600
	1107.71	2321.06	2917.26	2736.87	1811	1594.59	58200
	1121	2348.88	2967.3	2789.56	1825.64	1615.47	58800
	1141.6	2381.66	2997.52	2829.2	1839.02	1631.77	59400
	1147.3	2419.04	3028.3	2875.5	1854.48	1636.66	60000
	1143.25	2435.23	3073.29	2929.69	1858.7	1626.58	60600
	1149.37	2448.5	3108.72	2971.13	1870.85	1631.26	61200
	1144.42	2446.96	3141.21	3022.08	1876.31	1616.09	61800
	1145.21	2467.23	3170.88	3088.26	1887.47	1588.17	62400
	1143.64	2476.02	3241.74	3145.47	1916.23	1556.96	63000
	1127.87	2490.06	3294.27	3193.84	1946.15	1509.54	63600
	1105.72	2444.56	3408.42	3314.82	2019.72	1501.87	64200

## Sheet: MSD brain individual embryos
Figure 4N
controls	MSD of brain cells (µm2)
	control 1	control 2	control 3	control 4	Delta t (s)																Delta t (s)
	0	0	0	0	0																0
	6.04889	5.52688	6.0741	3.62752	600																600
	10.3971	9.64782	11.2398	6.75171	1200																1200
	15.0809	13.8084	17.3569	9.70684	1800																1800
	19.4811	18.7038	24.1131	12.8949	2400																2400
	24.6041	24.2087	32.1979	15.9974	3000																3000
	29.0356	29.7957	40.4964	19.2388	3600																3600
	33.8424	36.0381	49.5508	22.7499	4200																4200
	38.9737	42.5857	59.8147	26.3629	4800																4800
	44.4326	49.4013	70.8761	29.9227	5400																5400
	49.9063	56.4978	81.4745	33.4265	6000																6000
	55.7939	64.2345	92.6795	37.1824	6600																6600
	61.5392	72.3057	104.19	41.0389	7200																7200
	67.6586	80.7996	116.62	44.8151	7800																7800
	73.6833	90.0714	129.051	48.8475	8400																8400
	79.5101	100.112	142.09	52.6781	9000																9000
	85.6283	110.409	155.016	56.8447	9600																9600
	91.9669	121.291	168.213	61.1007	10200																10200
	98.2516	132.907	181.729	65.2493	10800																10800
	105.187	145.588	196.095	69.5261	11400																11400
	112.221	158.365	209.901	73.9894	12000																12000
	119.74	171.645	224.249	78.6921	12600																12600
	127.555	185.814	239.147	83.6226	13200																13200
	135.928	199.911	254.708	88.5935	13800																13800
	144.078	214.916	270.575	93.4527	14400																14400
	152.258	230.304	286.862	98.5859	15000																15000
	160.337	245.975	303.564	103.749	15600																15600
	168.118	262.006	320.072	108.672	16200																16200
	176.058	278.253	337.16	113.687	16800																16800
	184.402	294.965	354.615	118.496	17400																17400
	193.559	311.949	372.121	123.54	18000																18000
	203.265	329.388	389.397	128.389	18600																18600
	212.643	347.404	406.735	133.537	19200																19200
	222.856	366.42	424.039	138.526	19800																19800
	232.987	385.11	441.544	143.661	20400																20400
	243.11	404.995	458.886	148.939	21000																21000
	253.693	425.815	476.654	154.67	21600																21600
	265.241	447.297	494.138	160.555	22200																22200
	276.963	469.392	511.566	166.763	22800																22800
	288.861	491.979	528.623	172.942	23400																23400
	300.194	515.107	545.341	179.472	24000																24000
	312.466	538.474	562.483	186.216	24600																24600
	324.737	562.233	579.898	192.681	25200																25200
	337.507	586.327	598.248	198.734	25800																25800
	350.42	611.282	616.722	204.506	26400																26400
	363.744	637.064	633.889	209.717	27000																27000
	377.184	662.934	651.608	215.127	27600																27600
	390.209	688.546	669.056	219.833	28200																28200
	403.243	714.269	685.458	224.397	28800																28800
	416.044	740.136	702.222	229.351	29400																29400
	428.963	766.757	719.281	234.49	30000																30000
	441.502	793.527	736.06	239.866	30600																30600
	454.465	820.119	751.404	245.16	31200																31200
	467.868	846.262	766.664	250.575	31800																31800
	480.324	873.198	783.153	255.699	32400																32400
	492.907	901.106	799.269	259.349	33000																33000
	504.733	929.669	815.387	263.572	33600																33600
	516.966	957.084	832.139	267.984	34200																34200
	529.353	983.742	850.246	272.515	34800																34800
	541.489	1011.19	868.952	277.187	35400
	552.82	1038.83	886.838	281.618	36000
	564.758	1066.67	906.059	286.766	36600
	577.2	1094.61	924.404	291.246	37200
	589.524	1120.79	942.061	295.414	37800
	600.815	1145.39	959.778	299.73	38400
	612.592	1170.78	977.968	304.077	39000
	624.671	1195.74	997.138	308.687	39600
	637.167	1221.12	1017.61	313.769	40200
	649.718	1246.55	1038.33	318.465	40800
	660.683	1271.03	1059.41	323.431	41400
	670.808	1294.51	1079.18	328.487	42000
	681.785	1318.24	1097.64	333.483	42600
	691.539	1344.04	1116.98	338.593	43200
	700.55	1367.86	1134.27	343.416	43800
	709.35	1392.66	1154.16	348.88	44400
	717.907	1417.22	1173.06	355.102	45000
	726.508	1441.02	1193.9	360.925	45600
	733.755	1464.22	1212.7	366.797	46200
	741.067	1490.65	1231.42	372.615	46800
	746.235	1514.34	1249.15	377.757	47400
	748.743	1536.89	1267.64	383.268	48000
	749.229	1558.08	1284.4	389.551	48600
	746.197	1580.86	1299.29	394.951	49200
	744.422	1602.19	1313.19	400.1	49800
	743.381	1622.76	1327.9	404.817	50400
	742.263	1642.94	1340.09	411.873	51000
	743.947	1660.68	1351.93	419.135	51600
	743.805	1675.33	1363.42	427.001	52200
	742.612	1690.79	1373.97	435.172	52800
	741.776	1706.04	1390.85	443.49	53400
	741.996	1716.5	1404.31	453.16	54000
	736.935	1729.83	1419.66	463.78	54600
	732.837	1742.74	1432.79	473.899	55200
	729.473	1766.45	1452.4	484.362	55800
	724.102	1784.89	1472.3	494.629	56400
	720.468	1796.09	1491.79	502.351	57000
	713.654	1807.87	1514.83	511.773	57600
	704.341	1809.87	1546.7	524.892	58200
	691.716	1809.55	1581.47	531.216	58800
	670.996	1805.69	1605.28	536.423	59400
	651.088	1793.52	1639.66	540.356	60000
	630.878	1776.69	1674.52	542.765	60600
	612.154	1765.34	1714.72	546.657	61200
	596.464	1753.05	1755.78	546.974	61800
	587.052	1759.85	1796.35	547.716	62400
	587.872	1774.73	1831.28	530.323	63000
	591.191	1785.28	1849.8	525.206	63600
	557.858	1859.88	1899.19	569.081	64200
mutants	MSD of brain cells (µm2)
	mutant 1	mutant 2	mutant 3	Delta t (s)
	0	0	0	0
	7.43228	5.2623	5.30833	600
	12.791	10.2048	9.57563	1200
	18.3774	15.6298	14.1854	1800
	24.5907	21.7866	18.856	2400
	30.8942	28.4473	23.7506	3000
	37.7112	35.8297	28.79	3600
	44.8005	43.8373	34.2057	4200
	52.3144	52.4107	40.07	4800
	59.8269	61.7057	46.3267	5400
	68.2685	71.5897	52.8563	6000
	77.3409	82.136	59.5645	6600
	86.8798	93.6257	66.2258	7200
	96.6532	105.533	73.7128	7800
	106.734	117.737	81.4515	8400
	117.08	130.983	89.7037	9000
	127.856	144.443	98.5405	9600
	138.591	158.186	107.519	10200
	149.949	172.504	117.087	10800
	161.039	187.408	127.17	11400
	171.915	202.898	137.713	12000
	183.22	219.067	148.792	12600
	195.291	235.623	160.375	13200
	207.484	252.877	172.237	13800
	219.483	270.279	184.375	14400
	231.597	288.36	197.324	15000
	243.388	306.62	210.378	15600
	255.643	325.152	223.849	16200
	268.382	343.378	237.813	16800
	280.486	361.688	252.43	17400
	292.814	380.252	267.071	18000
	304.775	399.312	281.754	18600
	317.645	418.893	296.4	19200
	331.446	438.721	311.558	19800
	344.722	458.499	326.555	20400
	357.964	478.412	342.04	21000
	371.606	499.261	357.582	21600
	384.805	521.397	373.674	22200
	397.97	543.396	389.886	22800
	411.362	566.417	406.8	23400
	423.741	589.499	423.547	24000
	436.121	612.487	440.506	24600
	448.601	635.974	458.113	25200
	460.624	659.26	475.936	25800
	471.392	683.486	494.027	26400
	482.528	708.551	511.82	27000
	493.779	733.84	529.201	27600
	505.235	760.119	546.952	28200
	516.487	787.799	564.344	28800
	528.45	816.766	581.451	29400
	539.451	846.578	597.724	30000
	550.204	876.73	614.114	30600
	561.387	907.657	629.446	31200
	573.166	938.566	644.451	31800
	583.853	970.234	659.374	32400
	593.926	1002.8	674.385	33000
	604.401	1036.34	690.701	33600
	614.943	1070.69	706.341	34200
	625.293	1105.36	721.112	34800
	636.135	1141.58	735.919	35400
	646.363	1177.17	747.578	36000
	655.695	1213.94	760.088	36600
	665.386	1251.48	772.734	37200
	674.455	1288.85	784.724	37800
	683.955	1326.94	797.414	38400
	693.273	1365.13	809.961	39000
	703.773	1403.55	822.279	39600
	713.683	1439.16	832.95	40200
	724.321	1476.56	843.751	40800
	735.287	1514.06	854.647	41400
	746.18	1552.25	865.703	42000
	756.115	1591.8	876.091	42600
	765.16	1631.01	885.271	43200
	777.066	1673.75	894.032	43800
	789.118	1714.11	902.888	44400
	802.803	1757.39	912.197	45000
	815.44	1802.44	920.592	45600
	827.939	1848.02	928.624	46200
	840.8	1894.71	933.354	46800
	850.634	1942.99	935.692	47400
	860.202	1990.85	937.413	48000
	866.847	2037.6	939.935	48600
	873.829	2083.75	941.771	49200
	879.744	2128.67	944.654	49800
	888.933	2172.91	946.653	50400
	897.973	2212.01	946.13	51000
	900.653	2252.23	947.457	51600
	905.889	2291.72	950.636	52200
	911.797	2328.82	956.305	52800
	918.262	2371.91	963.902	53400
	922.17	2416.24	968.4	54000
	922.878	2461.44	972.83	54600
	918.732	2505.16	978.955	55200
	914.51	2554.58	979.342	55800
	906.15	2597.38	985.116	56400
	902.405	2643.41	989.029	57000
	903.751	2692.67	994.532	57600
	910.968	2734.61	1000.35	58200
	917.627	2789.23	1004.7	58800
	931.611	2832.45	1006.76	59400
	943.905	2881.25	1002.89	60000
	952.936	2938.89	994.263	60600
	960.646	2979.32	974.824	61200
	964.436	3028.77	951.086	61800
	986.73	3060.62	942.047	62400
	995.331	3125.77	953.172	63000
	1001.4	3163.87	973.375	63600
	1042.25	3242.5	1005.88	64200

## Sheet: Angle cell tracks Left Placode
Figure 4O	Angles of cell trajectories Left Placode (rad)
	cell1	cell2	cell3	cell4	cell5	cell6	cell7
control 1	-0.203493045257563	-1.00008306660554	-0.60554466360497	-0.399904296468119	-0.429178508001298	-0.660009043055932	-0.560686994982806
control 2	-0.470893858980703	0.257323714971089	-0.122971869564297	-0.0880073735277407	-0.099668652491162	-0.149812456572897	-0.44751997515717
control 3	0.131762266477926	-0.35299038782691	-0.600713783310994	-0.973037935201814	-0.122971869564297	-0.481827424073784	-0.562868232848111
control 4	-0.613601049641569	-0.612990301344508	-0.955934512368889	-0.358071478339762	-0.631290046832022	-0.67617401662228	-0.297027004423215
	cell1	cell2	cell3	cell4	cell5	cell6	cell7
mutant 1	-0.100921784667294	0.797445773251634	1.0873493252277	0.321750554396642	0.442374222976745	0.531177619225765	1.14794240066196
mutant 2	-0.03304581701893	0.392570135011829	0.404891786285083	0.700238770777742	0.547562235939997	0.00645152339296869	0.665289427830535
mutant 3	0.484931904794509	1.29384063008011	0.831449892689561	0.695363829603788	1.2784415985457	0.249308117811907	0.806438854484886

## Sheet: Angle cell tracks Rigth Placode
Figure 4O	Angles of cell trajectories Rigth Placode (rad)
	cell1	cell2	cell3	cell4	cell5	cell6	cell7
control 1	0.904827089415787	0.532322511232846	0.938047491792714	1.04002282959199	1.16892567935444	0.832981266674432	NA
control 2	0.422853926132941	0.502843210927861	0.316569253612404	0.898317824150051	0.43496695104558	0.355071550274889	0.383527515956992
control 3	0.874054045264886	0.575626997760366	0.404891786285083	1.32120940135791	0.515549007458979	0.538727454508046	0.450225596260715
control 4	1.43508940134178	0.151544074636851	0.739735725817165	0.747248742526466	0.452118993566518	-1.17439252202633	0.783761503647671
	cell1	cell2	cell3	cell4	cell5	cell6	cell7
mutant 1	-0.294462044634107	-0.558599315343563	-0.548942021197531	-0.463647609000806	0.441429043674087	0.0410727785904547	0.154996741923941
mutant 2	0.0254721965107228	-1.04154954596305	-0.0197993925663927	-0.575072289732391	0.439842582815736	-0.04239881792594	-0.375270822855957
mutant 3	-0.621041175037858	-1.50234984958911	-1.521684237177	-1.34224592464583	-1.46408824672171	-0.804509811848895	-1.32054182943396
