# Supplementary material for: Basement membranes are crucial for proper olfactory placode shape, position and boundary with the brain, and for olfactory axon development
Source: eLife. 2024 Dec 23;12:RP92004. doi: 10.7554/eLife.92004 (PMC11666240; doi:10.7554/eLife.92004)
Supplement: Figure 5—figure supplement 1—source data 1. [file elife-92004-fig5-figsupp1-data1.xlsx]

## Sheet: Brain width
Figure 5-figure supplement 1C	Width of the brain at different AP levels (µm) at 28 hpf
		controls
Anterior zone		85.3943	83.8517	82.085	79.996	93.4127	94.889	86.3443	78.8757	71.2953	75.658	67.116	92.3307	84.9007	83.648	83.4083	68.946	74.921
Central zone		93.9433	84.7943	95.9343	81.307	94.197	98.0387	88.7923	90.627	79.4763	83.4033	82.8997	104.777	98.8907	91.3197	93.6937	80.2133	87.8967
Posterior zone		104.203	99.6713	108.207	97.9303	102.637	111.904	91.7527	100.891	103.849	98.8943	83.699	114.475	104.39	97.9943	102.397	97.219	99.1883
		mutants
Anterior zone		67.4763	65.8317	62.33	69.9153	68.684	73.1427	73.843	73.2173	61.659	54.7567	73.0567	38.002	63.1477	60.332	64.182	59.8417	66.0503
Central zone		68.4297	79.5613	73.6413	74.4303	75.1237	89.6737	64.963	86.4993	72.271	72.5117	86.7057	58.612	81.4113	61.744	73.0127	80.517	85.796
Posterior zone		84.1013	103.238	79.778	81.0487	85.2267	102.542	85.9363	102.898	92.0253	79.0677	100.934	78.0603	101.087	77.3197	92.22	105.871	95.9833
Figure 5-figure supplement 1D	Width of the brain at different DV levels (µm) at 28 hpf
		controls
Dorsal zone		88.3537	87.2423	95.5013	77.4767	89.1393	99.338	86.744	86.8927	72.5993	78.43	74.3127	107.09	92.8483	81.1423	85.2273	72.1207	85.6177
Central zone		96.9953	87.752	94.7947	87.9193	96.562	102.649	93.7927	88.3577	88.2667	86.7977	79.602	98.9973	93.4997	90.9263	95.7823	83.9137	88.991
Ventral zone		98.1913	93.323	95.93	93.8373	104.545	102.845	86.3527	95.1437	93.7543	92.728	79.8	105.495	101.833	100.893	98.4893	90.344	87.3973
		mutants
Dorsal zone		48.5913	74.8697	61.7	67.729	62.4173	78.0897	55.385	81.511	70.538	61.287	75.8207	61.5607	88.2027	53.228	68.5177	67.532	69.227
Central zone		77.7367	84.0033	76.0243	74.3573	78.2603	85.159	76.9733	86.59	67.0407	65.8073	88.1353	55.776	81.2027	71.617	79.9703	86.2937	81.407
Ventral zone		93.6793	89.758	78.025	83.308	88.3567	102.11	92.384	94.514	88.3767	79.2417	96.74	57.3377	76.2407	74.5507	80.9267	92.4043	97.1957

## Sheet: Brain proliferation
Figure 5-figure supplement 1E	Number of PH3-positive cells in the brain at 16 hpf
	controls	mutants
	10	12
	31	19
	16	13
	28	32
	15	13
	21	15
	16	23
	15	17
	40
	18
	20
	33
	25
	16
	27
	13
	24
	19
	24
Figure 5-figure supplement 1F	Number of PH3-positive cells in the brain at 21 hpf
	controls	mutants
	33	14
	27	12
	17	27
	17	42
	33	14
	19	9
	22
	13
	14
	25
	9
	26
	13
	31
	33
	37
	26
	19
	20
	12
	20
Figure 5-figure supplement 1G	Number of PH3-positive cells in the brain at 28 hpf
	controls	mutants
	32	24
	32	41
	33	36
	23	49
	57	39
	44	46
	36	28
	32
Figure 5-figure supplement 1H	Number of PH3-positive cells in the brain at 36 hpf
	controls	mutants
	44	29
	35	47
	23	28
	35	36
	36	34
	26	29
	27	25
	36	28
	36	26

## Sheet: Brain apoptosis
Figure 5-figure supplement 1I
16 hpf
categories	0 casp3*-positive cell	1 or 2 casp3*-positive cell(s)	> 2 casp3*-positive cells
number of control embryos	12	8	5
number of mutant embryos	3	4	2
Figure 5-figure supplement 1J
21 hpf
categories	0 casp3*-positive cell	1 or 2 casp3*-positive cell(s)	> 2 casp3*-positive cells
number of control embryos	14	4	7
number of mutant embryos	3	0	6
Figure 5-figure supplement 1K
28 hpf
categories	0 casp3*-positive cell	1 or 2 casp3*-positive cell(s)	> 2 casp3*-positive cells
number of control embryos	7	2	0
number of mutant embryos	6	2	1
Figure 5-figure supplement 1L
36 hpf
categories	0 casp3*-positive cell	1 or 2 casp3*-positive cell(s)	> 2 casp3*-positive cells
number of control embryos	2	5	3
number of mutant embryos	2	5	3
