# Supplementary material for: Basement membranes are crucial for proper olfactory placode shape, position and boundary with the brain, and for olfactory axon development
Source: eLife. 2024 Dec 23;12:RP92004. doi: 10.7554/eLife.92004 (PMC11666240; doi:10.7554/eLife.92004)
Supplement: Figure 5—figure supplement 3—source data 1. [file elife-92004-fig5-figsupp3-data1.xlsx]

## Sheet: 28 hpf
Figure 5-figure supplement 3E	AP dimension of the left OP (µm)				Figure 5-figure supplement 3F	ML dimension of the left OP (µm)				Figure 5-figure supplement 3G	DV dimension of the left OP (µm)				Figure 5-figure supplement 3H	Length of the left axon bundle (µm)
28 hpf	controls	mutants				controls	mutants				controls	mutants				controls	mutants
	51.3611	63.4461				53.5676	42.6616				73.7758	68.3228				41.896	35.215
	51.3611	45.3186				37.2086	47.4731				65.4359	70.8889				43.805	31.554
	52.3682	47.3328				37.2086	44.5862				73.1342	77.3042				30.515	46.461
	57.4036	50.3541				38.4917	37.8502				86.2856	84.361				41.973	39.48
	56.3965	59.4178				47.4731	45.5485				67.6812	67.0397				54.18	37.704
	46.3257	44.3116				54.8507	50.8456				78.2665	84.9573				53.374	30.168
	46.3257	62.439				53.2469	45.0531				27.265	66.936				34.715	38.236
	47.3328	53.3753				48.4354	52.4547				71.5304	86.5663				33.984	42.123
	47.3328	51.3611				53.8884	52.1329				78.5872	72.4068				42.792	35.338
	57.4036	80				57.7376	47.7851				70.8889	80.9308				40.326	51.653
	41.2903	64				47.1523	53.0331				82.4364	80.6546				48	61.766
	47.3328	59				50.6807	57.4526				94.3047	84.5216				42.404	52.508
	56.3965	54				35.6048	51.9283				76.9834	76.5114				40.697	63.912
	42.2974					51.3223					60.3037					31.988
	45.3186					50.6807					89.1724					48.54
	53.3753					44.907					75.0588					40.597
	64.4532					35.7207					93.6461					40.091
	55.3895					48.593					94.6115					46.27
	45.3186					51.8111					71.7632					31.439
	54.3824					51.1675					61.4653					36.871
	53.3753					60.1781					77.8775					37.781
	47.3328					55.9946					78.1993					47.913
	62					53.5856					85.074					70.677
	46					49.7186					71.5395					57.134
	51					51.3759					67.3963					57.36
	57					52.4807					83.1405					62.628
	61					49.1661					82.0356					44.937
	58					49.7186					69.3298					77.291
	58					51.9283					77.34					57.935
	63					51.6521					80.3784					46.844
	55					47.2326					85.6264					45.046

## Sheet: 36 hpf
Figure 5-figure supplement 3I	AP dimension of the left OP (µm)				Figure 5-figure supplement 3J	ML dimension of the left OP (µm)				Figure 5-figure supplement 3K	DV dimension of the left OP (µm)				Figure 5-figure supplement 3L	Length of the left axon bundle (µm)
36 hpf	controls	mutants				controls	mutants				controls	mutants				controls	mutants
	56.3965	53.3753				59.2209	52.4803				66.9245	90.998				53.123	65.267
	56.3965	56.3965				56.3321	57.7765				83.776	77.5168				68.796	58.226
	53.3753	67				57.7765	61.3196				78.9613	92.808				63.665	75.6
	53.3753	66				56.8136	54.6904				84.2574	89.4934				61.842	70.508
	48.3399					47.6656					75.1095					65.118
	51.3611					59.2209					84.7389					52.115
	54.3824					59.7024					78.4798					64.019
	55.3895					53.9248					80.8871					56.642
	51					56.3477					92.2556					75.442
	65					62.4244					78.4448					74.617
	54					57.4526					80.6546					59.887
	59					56.9001					74.0254					68.041
	58					60.2147					98.3323					69.923
	53					54.138					87.8361					61.14
	61					60.7671					77.34					62.297
	68					50.8234					89.4934					74.937
	62					59.1098					39.2224					71.195
	58					58.5574					80.1021					65.98
	62					50.271					77.8924					71.688
	60					56.9001					86.7313					78.569
	54					50.271					74.0254					67.7858
