# Supplementary material for: Basement membranes are crucial for proper olfactory placode shape, position and boundary with the brain, and for olfactory axon development
Source: eLife. 2024 Dec 23;12:RP92004. doi: 10.7554/eLife.92004 (PMC11666240; doi:10.7554/eLife.92004)
Supplement: Figure 5—source data 1. [file elife-92004-fig5-data1.xlsx]

## Sheet: Brain width
Figure 5C	Width of the brain at different AP levels (µm) at 36 hpf
		controls
Anterior zone		72.4253	89.6693	75.0497	86.2003	89.5063	79.9037	97.195	75.0113	78.8033
Central zone		83.8453	96.368	85.8353	87.9287	92.4597	95.082	105.275	85.797	89.2033
Posterior zone		67.6413	97.157	78.7897	67.479	92.273	77.804	101.476	91.0877	89.8943
		mutants
Anterior zone		51.276	52.4453	60.715	59.5437	64.3487	48.576	55.5657	57.5757
Central zone		63.6437	62.2477	88.9177	69.0373	76.0937	69.0523	74.0643	69.3577
Posterior zone		76.9663	78.217	104.286	78.4463	63.7283	89.3903	69.8413	70.5253
Figure 5D	Width of the brain at different DV levels (µm) at 36 hpf
		controls
Dorsal zone		68.431	80.4583	73.7537	80.7193	92.974	64.3203	94.786	72.8143	75.5067
Central zone		75.305	88.5297	76.2577	77.491	87.5	81.2017	93.102	88.196	82.8
Ventral zone		80.176	114.206	89.6633	83.3977	93.765	107.268	116.058	90.8857	99.5943
		mutants
Dorsal zone		55.1033	50.2053	82.822	59.392	79.07	74.068	75.4337	55.9763
Central zone		63.9187	68.4253	89.5123	67.725	72.51	68.924	55.9813	64.3483
Ventral zone		72.864	74.2793	81.5843	79.9103	52.5907	64.0267	68.0563	77.134

## Sheet: Distortion index
Figure 5G	Distortion index of the left OP				Figure 5H	Distortion index of the rigth OP
	controls	mutants				controls	mutants
	3.32	7.99				3.06	3.52
	2.65	3.78				2.22	3.54
	2.26	4.82				2.31	3.83
	2.4	2.58				2.35	3.82
	1.01	3.18				2.29	3.44
	1.38	2.76				2.32	4.54
	2.76	2.46				2.15	5.19
	2.38	3.71				2.33	5.05
	2.3	2.64				2.53	4.76
	2.31	2.78				2.34	4.52
	2.27	2.85				2.49	4.04
	2.38	3.1				2.3	3.05
	2.22	3.05				2.5	3.07
	2.42	3.19				2.3	3.15
	2.25	4.13				2.43	3.27
	4.31	3.89				2.29	3.24
	2.33	4.04				2.37	4.3
	2.34	5.51				2.36	3.71
	2.38	5.32				2.34	3.34
	2.45	3.02				2.59	3.69
	2.42	3.02				2.64	3.22
	2.41	3.17				2.6	2.68
	2.55	3.3				2.54	2.96
	2.41	3.52				2.48	2.31
	2.46	3.55				2.51	2.77
	2.48	3.44				2.62	2.32
	2.55	3.45				2.77	2.56
	2.57	3.83				2.69	2.48
	2.67	3.98				2.67	2.36
	2.73	4.73				2.73	2.43
	2.75	4.71				2.68	2.38
	3.44	4.47				2.74	2.48
	3.58	4.1				2.69	3.2
	2.58	4.69				3.25	3.43
	2.39	5.46				2.76	3.57
	2.32	3.22				2.25	4.35
	2.38	4.63				2.38	3.67
	2.34	5.4				2.33	4.17
	4.58	6.68				2.36	3.44
	2.32	3.43				2.56	2.83
	2.76	2.65				2.65	2.8
	2.26	2.74				2.54	2.87
	2.59	2.82				2.63	2.93
	5.07	6.44				2.56	3.39
	2.73	3.14				2.63	3.88
	4.43	3.05				2.6	2.9
	2.51	2.77				2.57	2.76
	4.33	3.18				2.54	2.48
	4.14	3.57				2.48	2.5
	4.34	3.78				3.55	2.69
	4.65	3.29				3.64	2.35
	2.77	3.51				2.96	2.29
	3.11	4.62				3.31	2.32
	3.02	4.47				3.25	2.41
	3.37	3.88				3.38	2.57
	3.07	4.03				3.36	2.82
	2.49	4.77				3.33	2.71
	2.83	4.46				3.29	2.78
	0.65	3.99				3.29	3.12
	0.64	3.92				3.44	5.19
	0.73	4				3.96	4.99
	0.61	5.58				4.27	5.35
	0.6	3.91				3.98	4.21
	0.77	4.46				4.4
	0.73	3.78				4.57
	0.82	3.37				5.07
	1.22	3.1				4.31
	2.65	3.17				4.49
	1.77	2.96				4.51
	3.4	3.15				4.03
	2.96	3.47				3.74
	2.21	3.44				3.39
	3.85	4.22				3.92
	3.12	4.22				4.24
	3.55	4.01				2.6
	3.49	3.2				2.43
	2.61	3.29				2.49
	2.64	3.22				2.21
	2.72					4.71
	3.01					4.02
	2.37					2.34
	0.81					2.88
	0.63					2.37
	0.67					2.31
	1.18					2.43
	3.56					2.81
	3.13					2.45
	3.45					2.39
	2.88					2.39
	2.2					2.36
	3.07					2.79
	3					2.56
	3.94					2.86
	2.69					2.88
	2.7					2.62
	2.74					3.18
	2.64					3.32
	3.38					4.13
	3.39					4.09
	3.15					3.94
	2.94					3.86
	3.03					3.79
	3.03					3.83
	3.45					3.88
	3.53					3.49
	3.43					3.61
	3.15					3.46
	3.11					3.58
	3.07					3.6
	3					3.54
