# Supplementary material for: Basement membranes are crucial for proper olfactory placode shape, position and boundary with the brain, and for olfactory axon development
Source: eLife. 2024 Dec 23;12:RP92004. doi: 10.7554/eLife.92004 (PMC11666240; doi:10.7554/eLife.92004)
Supplement: Figure 6—source data 1. [file elife-92004-fig6-data1.xlsx]

## Sheet: 200-400 min
Figure 6D	Speed of growth cones (µm/h)				Figure 6E	Persitence of growth cones
	controls	mutants				controls	mutants
	4.50595	5.95107				0.178694	0.187548
	3.04704	2.67627				0.145859	0.0880668
	9.11442	3.24438				0.49522	0.110008
	7.11462	1.79558				0.457337	0.0892446
	4.55437					0.268394
	13.6551					0.691466

## Sheet: 400-600 min
Figure 6G	Speed of growth cones (µm/h)				Figure 6H	Persitence of growth cones
	controls	mutants				controls	mutants
	6.02369	0.534242				0.193899	0.0232641
	3.66429	4.04563				0.159221	0.242011
	3.7934	3.06631				0.135892	0.0934084
	3.07459	8.68131				0.265363	0.381645
	8.77663					0.661
	2.36534					0.13786
	2.84022					0.161763
	0.289374					0.0241628
	4.2668					0.171012
	3.68058					0.284779
	7.85282					0.486581
	5.84835					0.281717
	4.08822					0.317739
	3.85791					0.200356
	4.64822					0.270422

## Sheet: 600-800 min
Figure 6J	Speed of growth cones (µm/h)				Figure 6K	Persitence of growth cones
	controls	mutants				controls	mutants
	3.04696	1.96119				0.138878	0.0987154
	2.19705	2.59308				0.123826	0.125204
	1.3253	4.13502				0.0993513	0.17214
	2.57887	5.70914				0.152842	0.271568
	3.85643	2.67497				0.268458	0.130996
	14.8748					0.494877
	5.80046					0.323873
	1.86124					0.146075
	1.03937					0.136373
	1.48554					0.136634
	2.65175					0.209143
	4.02401					0.233038
	3.95414					0.257899
	3.31031					0.191032
	6.09365					0.292612
	1.9127					0.134158
	1.59946					0.109936
	4.25635					0.319609

## Sheet: 800-1000 min
Figure 6M	Speed of growth cones (µm/h)				Figure 6N	Persitence of growth cones
	controls	mutants				controls	mutants
	3.76229	2.97033				0.342919	0.125001
	4.0483	3.71613				0.312632	0.166388
	2.98713	2.41389				0.251925	0.173881
	1.3317	4.39429				0.102	0.290651
	1.20589	5.60622				0.076077	0.351313
	3.1852	2.47884				0.318709	0.111611
	2.78767	4.44939				0.302882	0.201143
	1.67363					0.209509
	2.19048					0.147163
	2.23074					0.146497
	1.67118					0.117007
	2.63446					0.180128
	2.27264					0.163137
	1.6233					0.14145
	0.696069					0.0565855
	2.55318					0.221806
