# Supplementary material for: Basement membranes are crucial for proper olfactory placode shape, position and boundary with the brain, and for olfactory axon development
Source: eLife. 2024 Dec 23;12:RP92004. doi: 10.7554/eLife.92004 (PMC11666240; doi:10.7554/eLife.92004)
Supplement: Figure 6—source data 2. [file elife-92004-fig6-data2.xlsx]

## Sheet: 200-400 min
Figure 6C
	embryos	angles of axon growth trajectories (rad)
controls	control 1
	control 2	-0.242818839
	control 3	-0.864597234	-0.654570767323391	-1.23334025756711
	control 4
	control 5
mutants	mutant 1	0.35877067	0.394791119699761
	mutant 2
	mutant 3	1.13838855122436
	mutant 4	1.49724503630636
	mutant 5

## Sheet: 400-600 min
Figure 6F
	embryos	angles of axon growth trajectories (rad)
controls	control 1	-0.859337201055387	-0.909753157944211
	control 2	-0.496422753	-0.203493045257563	-0.519146114	-0.346135963569359
	control 3	-0.211093333	0.0399786871232903	1.10714871779406	-1.47112767430373
	control 4	-1.368474698	-0.463647609000808
	control 5	-0.442374223
mutants	mutant 1	0.03029376	0.0735512904885393
	mutant 2	0.282554952469585
	mutant 3
	mutant 4
	mutant 5	0.32175055439668

## Sheet: 600-800 min
Figure 6I
	embryos	angles of axon growth trajectories (rad)
controls	control 1	-1.5707963267949	0.741947268005921	-0.753151280962193
	control 2	-0.470404263	-1.51529782154917	-0.639385905686169	-0.444419209901093
	control 3	0.694738276	0.117108744566865	-0.398522445666426	-0.887087015160535
	control 4	-0.614662952	-0.291456794477874	0.266252049150924	-0.175450005436815	-0.382607214357798
	control 5	0.223476601	0.336674819386728
mutants	mutant 1	-1.261093382
	mutant 2	0.968508981
	mutant 3
	mutant 4	0.420663349133036
	mutant 5	-0.694738276196704	0.982793723

## Sheet: 800-1000 min
Figure 6L
	embryos	angles of axon growth trajectories (rad)
controls	control 1	0.785398163397458	-1.03037682652429	-0.404891786285086
	control 2	0.18534795	1.50422816301906	0.0696545737285689	-0.211093333222754
	control 3	-0.609163466	-0.287281453397133	0.333244301111671	1.19552550393895
	control 4	-0.495133263	-1.19990503798223	-0.516230670611748	-0.817645045832703	1.08389709498363
	control 5
mutants	mutant 1
	mutant 2	-1.499488862	-0.386337214821314
	mutant 3
	mutant 4	0.658806036117473	0.876058050598191	-0.394791119699762
	mutant 5	-0.690446457054691	-0.726642340681722
